1                   **Time- and cell-dependent atypia and cell death are caused by**  
2                   **progressive deficiency in DNA replication**

3  
4                   Alex Y. Lin<sup>1,2\*</sup>, Georgia K. Thomas<sup>1,2</sup>, Khai Chung Ang<sup>1,2</sup>,  
5                   Damian B. van Rossum<sup>1,2</sup>, Victor A. Canfield<sup>1,2</sup>, and Keith C. Cheng<sup>1,2\*</sup>  
6

7  
8  
9                   <sup>1</sup>The Jake Gittlen Laboratories for Cancer Research, Penn State College of Medicine, Hershey, PA, USA;

10                   <sup>2</sup>Division of Experimental Pathology, Department of Pathology, Penn State College of Medicine, Hershey, PA, USA

11                   \*Co-corresponding authors: [kcheng76@gmail.com](mailto:kcheng76@gmail.com) (KCC), [ayl114@psu.edu](mailto:ayl114@psu.edu) (AYL)

12  
13  
14  
15                   Short title: DNA replication deficiency mediates cell-specific atypia and cell death

16                   Keywords: Pol  $\alpha$ , *pola2*, nuclear atypia, cell death, zebrafish  
17

18

## Abstract

19 Pleiotropy caused by single-gene mutations is common and poorly understood. A zebrafish null  
20 mutant of DNA polymerase  $\alpha$  subunit B, *huli hutu* (*hht*), evolves a complex pleiotropy associated  
21 with DNA damage and S phase arrest across multiple organ systems over 5-7 days, including  
22 nuclear atypia, a common cellular feature in human cancers and pre-cancers, in gastrointestinal  
23 organs, and nuclear fragmentation in the eye and brain. The pleiotropic pattern of *hht* phenotypes  
24 is explained by progressive loss of wild-type maternal *pola2* function in homozygous mutant  
25 embryos whose *pola2* mRNA becomes undetectable by 24 hours post-fertilization (hpf). Inhibition  
26 of DNA synthesis by aphidicolin or hydroxyurea in wild-type embryos from 24 hpf phenocopied  
27 the pleiotropic pattern of *hht*. These results are consistent with a model in which time-sensitive,  
28 reduced capacity for DNA synthesis results in cell death in fast-replicating cells, and nuclear atypia  
29 in tissues with fewer and larger cells.

30

## Introduction

31 Changes in nuclear morphology occur during normal cellular processes such as mitosis,  
32 differentiation, and cell migration (Jevtić *et al.* 2014, Calero-Cuenca *et al.* 2018), but  
33 histologically-defined cellular atypia, characterized by darker hematoxylin staining and large,  
34 irregular nuclear shape, is common in both neoplasia and in settings that involve physical or  
35 chemical damage to DNA, such as UV-irradiation and chemotherapy (Blum 1978, Stenbäck 1978,  
36 Carr and LiVolsi 1989, Kim *et al.* 2016). Nuclear atypia is also used as a diagnostic signature in  
37 many human cancers and pre-cancers (Rosai 2004, Billings and Goldblum 2010, Kumar *et al.*  
38 2010, Lanzkowsky *et al.* 2016, Pizzorno *et al.* 2016). The presence and severity of nuclear atypia  
39 generally correlates with higher tumor grade and poor prognosis (Rosai 2004, Kodota *et al.* 2014,  
40 Manimaran *et al.* 2014, Yamaguchi *et al.* 2015, Poropatich *et al.* 2016, Zhou 2018). Despite the  
41 clinical diagnostic relevance of nuclear atypia, its genetic and mechanistic origins are poorly  
42 understood.

43

44 The small size of zebrafish larvae allowed us to generate histological arrays for pursuit of a  
45 histology-based forward genetic screen to identify genes that can cause nuclear atypia (Mohideen  
46 *et al.* 2003). Our laboratory identified a recessive larval-lethal mutant, *huli hutu* (*hht*), that develops  
47 optical opacity of the brain, small eyes, an upward curvature of the body, and dies after 5 to 7 days  
48 of development. Histology and X-ray histotomography revealed that virtually all organs and  
49 tissues exhibited severe cytological abnormalities (Mohideen *et al.* 2003, Ding *et al.* 2019). Highly  
50 proliferative tissues, particularly of the retina and brain, and to a lesser extent, the gastrointestinal  
51 tract organs, were affected most dramatically.

52

53 Positional cloning shown here revealed a frameshift mutation in *pola2* in *hht*, which encodes the  
54 B subunit of the DNA polymerase  $\alpha$ -primase complex (Pol  $\alpha$ ). Immediate growth arrest  
55 phenotypes associated with *pola2* mutation in two other organisms, *Saccharomyces cerevisiae*,  
56 (Foiani *et al* 1994) and *Arabidopsis thaliana* (Yang *et al.* 2009) begged the question of the reason  
57 underlying the longer survival of zebrafish *pola2* mutants. In *Caenorhabditis elegans*, mutation  
58 of the *pola2* paralog *div-1* substantially increased the duration of interphase and produced embryos  
59 that failed to hatch or to generate intestinal or pharyngeal cells (Encalada *et al.* 2000). We detected  
60 wild-type maternal *pola2* mRNA in homozygous mutant embryos, providing an explanation for  
61 the extended lifespan of *pola2* mutant zebrafish. Consistent with the disappearance of detectable  
62 *pola2* mRNA at 24 hpf, two independent chemical means of inhibiting DNA synthesis beginning  
63 at 24 hpf phenocopied cell-specific *hht* phenotypes. Here, we show correlations between  
64 replicative demand and DNA damage that appear to explain the disparity in mutant phenotype  
65 between cell types. This work also sheds light on potential mechanisms of pleiotropy, which are  
66 being increasingly recognized as common in biology and disease (Goh *et al.* 2007, Ittisoponpisan  
67 *et al.* 2017).

68  
69  
70  
71  
72  
73  
74  
75  
76  
77  
78  
79  
80  
81  
82  
83  
84  
85  
86  
87  
88

## Results

### *A zebrafish mutant with abnormal nuclear morphology*

The gross phenotype of *hht* mutants is evident at 3 days post-fertilization (dpf) under a dissecting microscope and includes reduced head and eye size, a curved body, and a pronounced yolk (Mohideen et al. 2003, **Fig. 1A**). This gross phenotype persists until death, which occurs between 5 and 7 dpf (**Fig. 1B**). A detailed examination by histology at 5 dpf showed that while all organs and tissues were distinguishable, virtually all exhibited severe cytological changes (**Fig. 1C**). Highly proliferative tissues, including retina, brain, and gastrointestinal tract organs, were affected most dramatically. Enterocytes in the *hht* intestinal lumen were irregular in polarity, size and shape, cellular and nuclear boundaries were difficult to define, and cell nuclei were often hyperchromatic and contained prominent nucleoli. Other endodermally-derived organs such as pancreas and liver also exhibited severe cytologic atypia, often presenting with enlarged nuclei and high variability in cellular and nuclear size and shape. Dysmorphologies were also detected in cartilage, where the normal aligned arrangement of cartilage cells in neat rows (in wild-type siblings) is replaced by cells with variable shapes, sizes, and polarity, and irregular arrangements. The eyes of *hht* mutants have misshapen lenses and retinas with a substantial reduction in cell number, a loss of stratification of retinal layers, and nuclear fragmentation. Further characterization using the interactive x-ray histotomography zebrafish database, 3d.fish, revealed stark contrast in phenotype between dividing and nondividing cells: dying cells in the retina vs. well-aligned, differentiated sensory epithelium (**Fig. 2**, Ding *et al.* 2019, Dyballa *et al.* 2017).

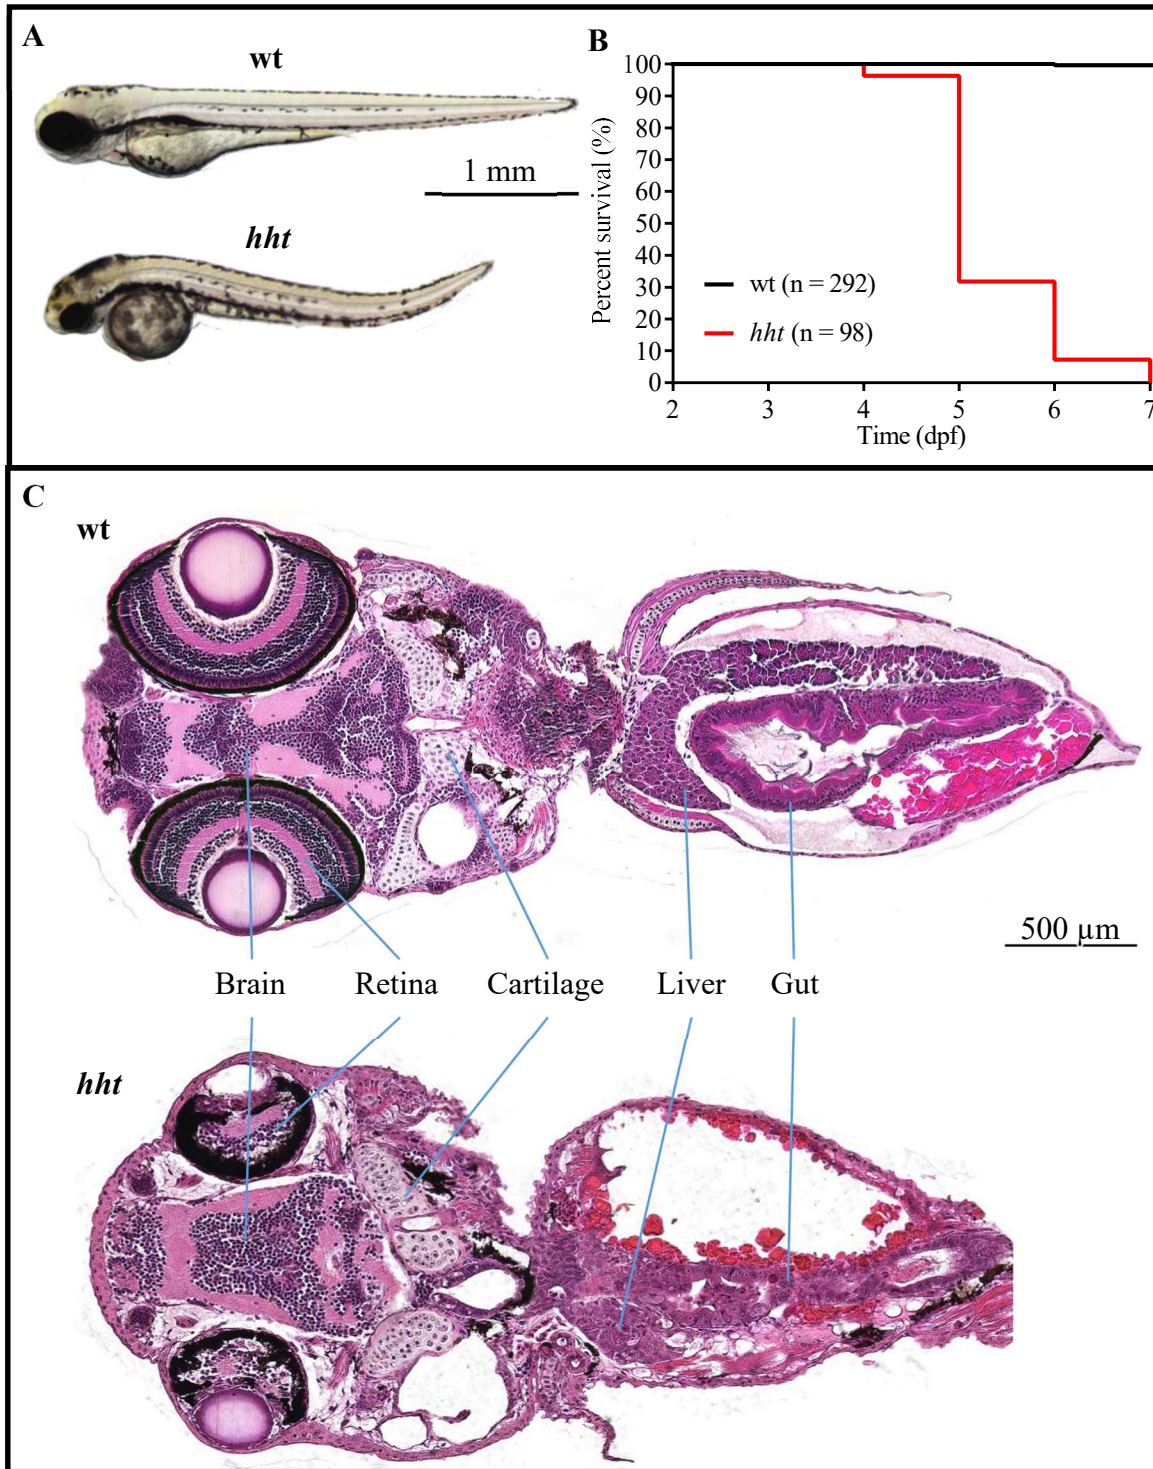

**Figure 1. The pleiotropic *hht* mutant survives up to 7 days.** A) The *hht* mutant gross phenotype includes reduced head and eye size, an enlarged yolk, and dorsal curvature of the tail. B) The *hht* mutants show increasing larval lethality over 7 days; none survive past 7 days. In the same time period, only 1 wild-type sibling died. C) 5 dpf *hht* mutants show disruption in tissue organization and a range of cellular dysmorphologies across most cell types.



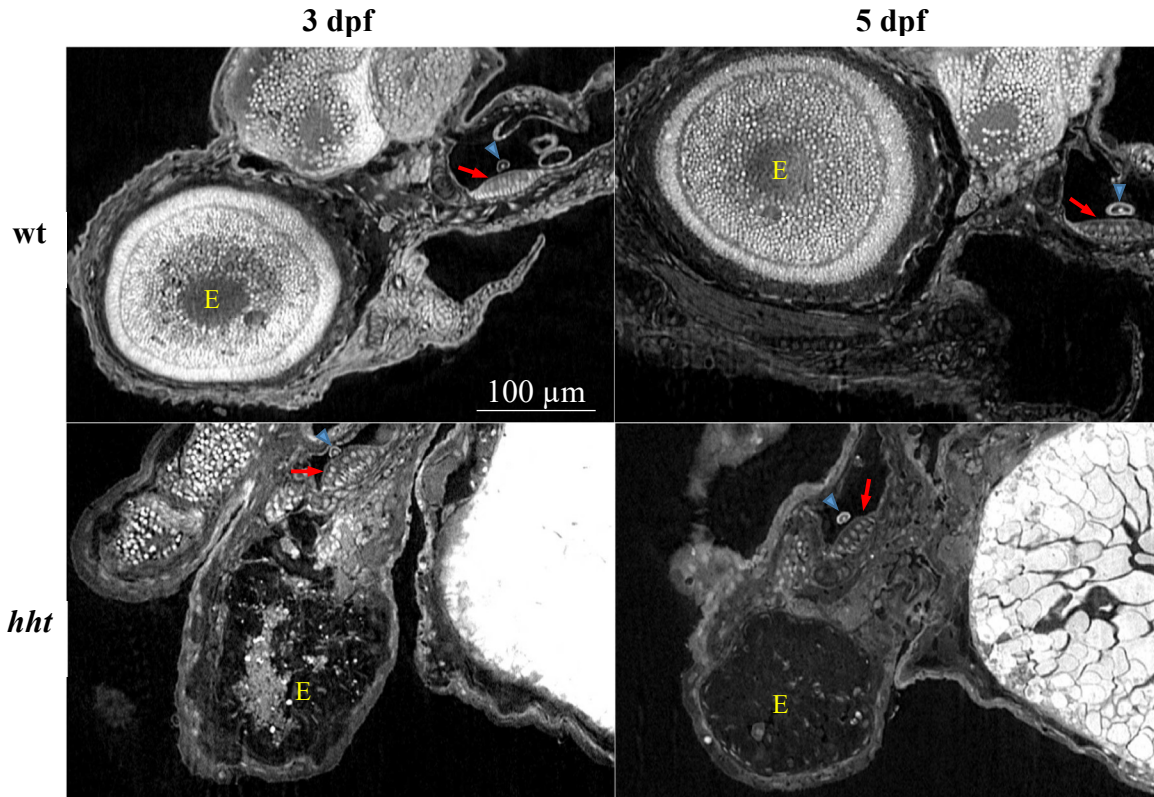

**Figure 2. X-ray histotomography of eye and sensory epithelium in wild-type and *hht* larvae.** Images of the eye and sensory epithelium of wild-type and *hht* fish at 3 and 5 dpf are extracted from the interactive 3d.fish database developed by Ding *et al.* (links in Materials and Methods). Retinal cells, which replicate quickly to large numbers in wild-type larvae, exhibit drastic cell loss accompanied with nuclear fragmentation in *hht* mutants. The sensory epithelium, which becomes fully differentiated and consists of a small number of cells, appears normal and organized in both wild-type and mutant larvae. Red arrows = sensory epithelium; blue arrow = otolith. Scale bar = 100 μm.

90

91

92 ***Pola2* mutation is responsible for the *hht* phenotype**

93 *Positional cloning of hht*

94 Microsatellite-based positional cloning and gene knockdown by morpholino oligonucleotides was

95 used to show that the causative mutation for the *hht* phenotype is in *pola2*. The identification of

96 zero recombinants in 1948 meioses with markers *z10868* and *z15236* revealed that the gene

97 responsible for the *hht* phenotype was within 0.05 centimorgans (cM) of these markers, which

98 corresponds to about 35.5 kb in zebrafish (Shimoda *et al.* 1999). These two markers were flanked

99 on either side by microsatellite markers *z26580* and *z13225*, each of which had one recombinant  
100 in 1948 meioses, indicating that the causative mutation resides between these markers (**Fig. 3A**).

101 Five candidate genes, *cenph*, *dimt11*, *mier3b*, *mrps36*, and *pola2*, are annotated in this region.

102

103 To identify the gene responsible for the *hht* phenotype, one translational blocking and two splice-  
104 junction blocking morpholino oligonucleotides (MOs) were designed per candidate gene and  
105 injected into wild-type zebrafish embryos at the one-cell stage to inhibit translation or RNA  
106 splicing, respectively. Only *pola2* and *dimt11* morphants exhibited a combination of reduced head  
107 and eye size, a pronounced yolk, and a dorsal curvature that were grossly similar to *hht*  
108 (**Supplemental S1**). Histological examination of cellular phenotype at 3 dpf revealed striking  
109 similarities between *pola2* morphants and *hht*, both demonstrating reduced retinal volume and cell  
110 number, loss of retinal layers, fragmented cell nuclei, and a thickened uneven corneal epithelium  
111 (**Fig. 3B**). The eyes of *dimt11* morphants, while distinctly abnormal compared with wild-type  
112 zebrafish, retained the overall size, ovoid shape, some retinal layering, and cell types of wild-type  
113 eyes, and lacked the profound deficiencies found in *hht* eyes. Taken together, mapping data and  
114 the near identity in phenotypes of *hht* and *pola2* morphants indicate that the affected gene in *hht*  
115 is *pola2*.

116

117 Sequencing of gDNA and cDNA of wild-type and mutant *pola2* revealed a 2-nucleotide AC  
118 insertion at the double AC repeat at the 68<sup>th</sup> nucleotide from the translation start site (**Fig. 3C**).

119 The frameshift mutation results in a premature stop codon at the 38<sup>th</sup> amino acid position (**Fig.**  
120 **3D**), suggesting that the final protein product is truncated and non-functional. The AC insertion,  
121 located at the 2<sup>nd</sup> exon of the 19-exon zebrafish *pola2* gene, is therefore most likely the causative



122 mutation. To verify this insertion, genomic DNA from 20 each of *hht* larvae and wild-type larvae  
 123 from wild-type siblings of their parents was pooled to sequence PCR amplicons of the 2<sup>nd</sup> exon of  
 124 *pola2*; the 2-nucleotide insertion was present in the *hht* pool, but not the wild-type pool.  
 125

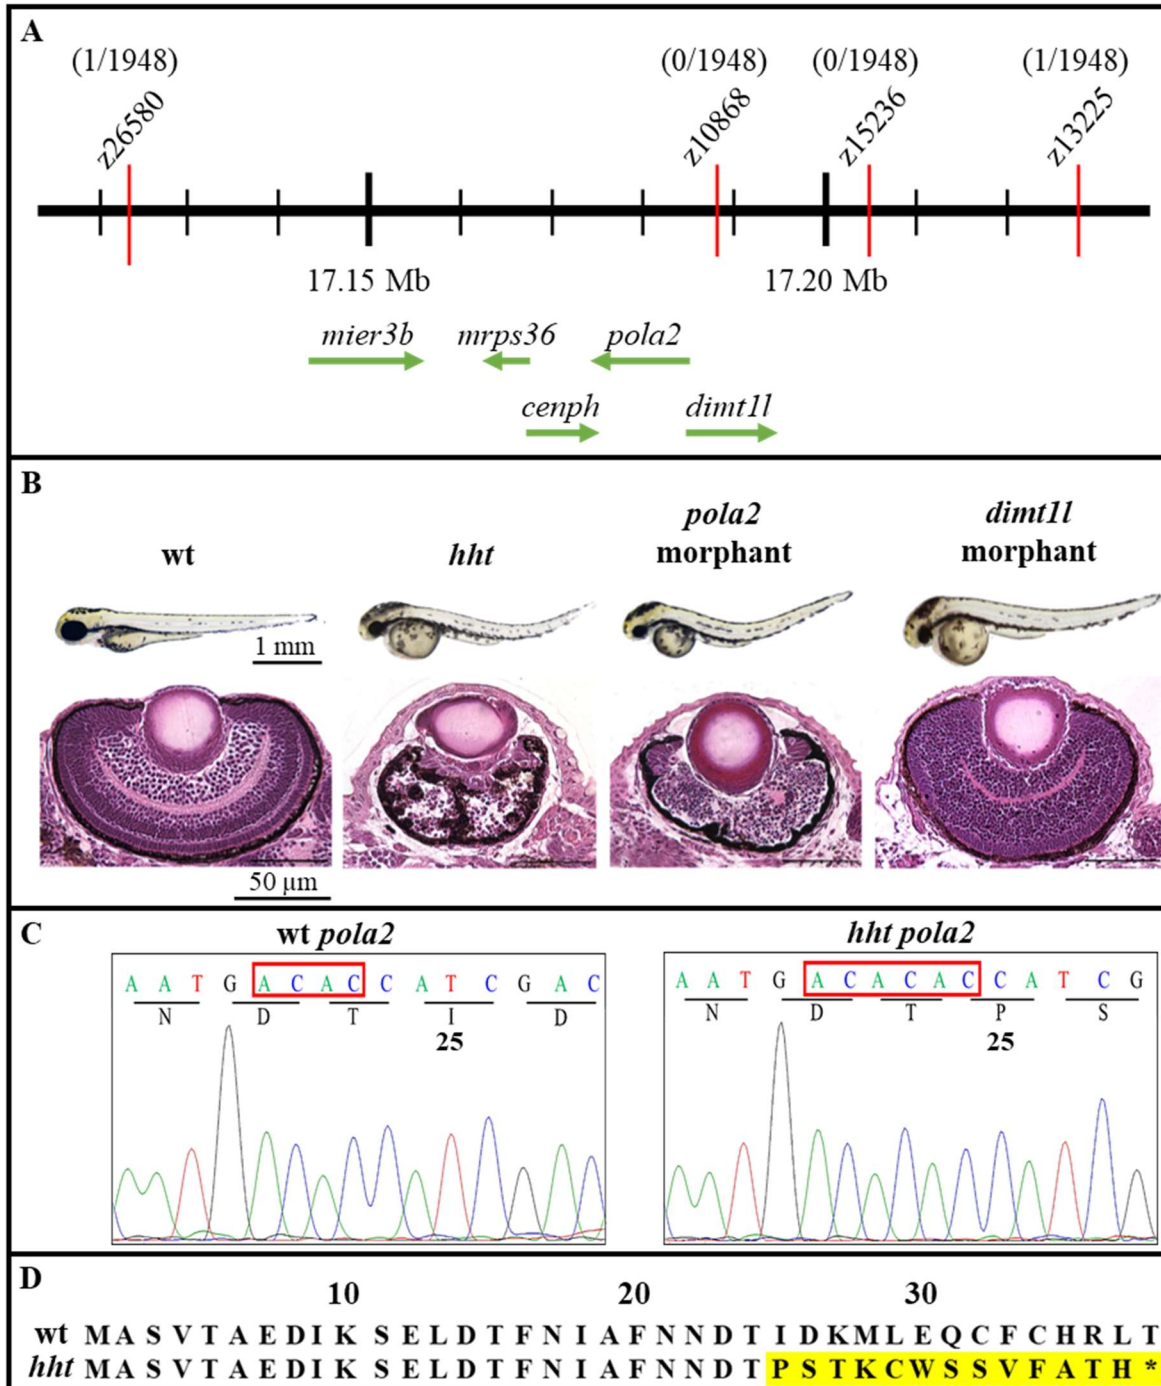

126

**Figure 3. Microsatellite-based positional cloning of *pola2*.** **A)** In positional cloning, the frequency of co-segregation of a phenotype of interest and polymorphic markers is used to locate the causative mutation. The map distance between the causative mutation and the markers is calculated from the frequency of recombinants as indicated above each marker. For markers *z26580* and *z13225*, 1 recombinant out of 1948 meiosis corresponds to ~ 0.05 centimorgans (cM), or 32.5 kb, in zebrafish. The lack of recombinants for markers *z10868* and *z15236* indicates that the causative mutation is physically closer to these two markers and resides in the interval between *z26580* and *z13225*. Five candidate genes, *mier3b* (mesoderm induction early response factor 1, family 3 b), *mrps36* (28S mitochondrial ribosomal protein S36), *cenph* (centromere protein H), *pola2* (DNA polymerase alpha, subunit B), and *dimt11* (dimethyladenosine transferase), were annotated in the zebrafish genomic database in the identified GRCz11 region. **B)** Gross and histological examination of the eyes of wild-type, *hht*, *pola2* morphant, and *dimt11* morphant revealed a striking similarity in reduced cell number, loss of stratification, thickened corneal epithelium, and disruption in the pattern of retinal pigmented epithelial pigment between *hht* and *pola2* morphant, suggesting that *pola2* was the affected gene in *hht*. **C)** A 2-nucleotide AC insertion in the double AC repeat starting at the 68<sup>th</sup> nucleotide was detected in *hht*. **D)** This frameshift mutation results in changes in amino acid sequence starting at the 25<sup>th</sup> amino acid, ending with a premature stop codon at the 38<sup>th</sup> amino acid position. (red box = AC insertion; yellow highlight = amino acid change; asterisk = stop codon).

127

128

129 *Partial rescue of the huli hutu mutant phenotype with wild-type *pola2* mRNA*

130 One prediction of *pola2* being the affected gene in *hht*, is that injection of wild-type mRNA would

131 rescue at least some of the several phenotypes of *hht* fish. Wild-type *pola2* mRNA was transcribed

132 from a cDNA clone from the wild-type Connors background strain and injected into embryos from

133 a  $\frac{hht}{+} \times \frac{hht}{+}$  cross at the 1-cell stage with the expectation of a 1:2:1 ratio of  $\frac{+}{+}$ ,  $\frac{hht}{+}$ , and  $\frac{hht}{hht}$

134 genotypes (**Supplemental S2**). At 3 dpf, 90% of injected  $\frac{hht}{hht}$  larvae, identified by genotyping,

135 were partially rescued, exhibiting an intermediate gross phenotype – a straight body and yolk

136 resembling that of a wild-type, but with eyes and brain that are smaller than wild-type but larger

137 than *hht* (**Table 1, Fig. 4**). This intermediate phenotype has not been seen in hundreds of crosses

138 between *hht* heterozygotes. All larvae with an intermediate phenotype were genotypically

139 homozygous mutant ( $\frac{hht}{hht}$ ). Retinal cell layering of the rescued fish was reminiscent of those seen

140 in homozygous wild-type larvae. The *hht* intestinal epithelial phenotype, in which cell nuclei show  
 141 loss of polarity and prominent nucleoli, was absent in mRNA-rescued *hht* larvae. Fragmented  
 142 nuclei in the brain and eyes of *hht* larvae were also absent in both wild-type and rescued fish. The  
 143 incomplete rescue phenotype can be explained by an expected degradation and/or dilution of the  
 144 injected wild-type *pola2* mRNA over time, leading to a slower rate of cell division than in wild-  
 145 type fish.

146 Table 1: Wild-type *pola2* mRNA rescues *hht* mutants

| Injected mRNA           | Total | $\frac{+}{+}$ , $\frac{hht}{+}$       | $\frac{hht}{hht}$                           |                           |
|-------------------------|-------|---------------------------------------|---------------------------------------------|---------------------------|
|                         |       | Phenotypically wild-type / (expected) | Partially rescued / total $\frac{hht}{hht}$ | Phenotypically <i>hht</i> |
| none                    | 182   | 136 / (137)                           | 0 / 46                                      | 46                        |
| wt <i>pola2</i> RNA     | 302   | 234 / (227)                           | 61 / 68                                     | 7                         |
| mutant <i>pola2</i> RNA | 75    | 60 / (56)                             | 0 / 15                                      | 15                        |

A mixture of wild-type and mutant embryos from a  $\frac{hht}{+} \times \frac{hht}{+}$  cross were injected at the 1-cell stage with phenol red, 200 pg wild-type *pola2* mRNA, or 200 pg mutant *pola2* mRNA. Number of embryos injected with no mRNA or wild-type *pola2* mRNA was aggregated from three separate experiments.



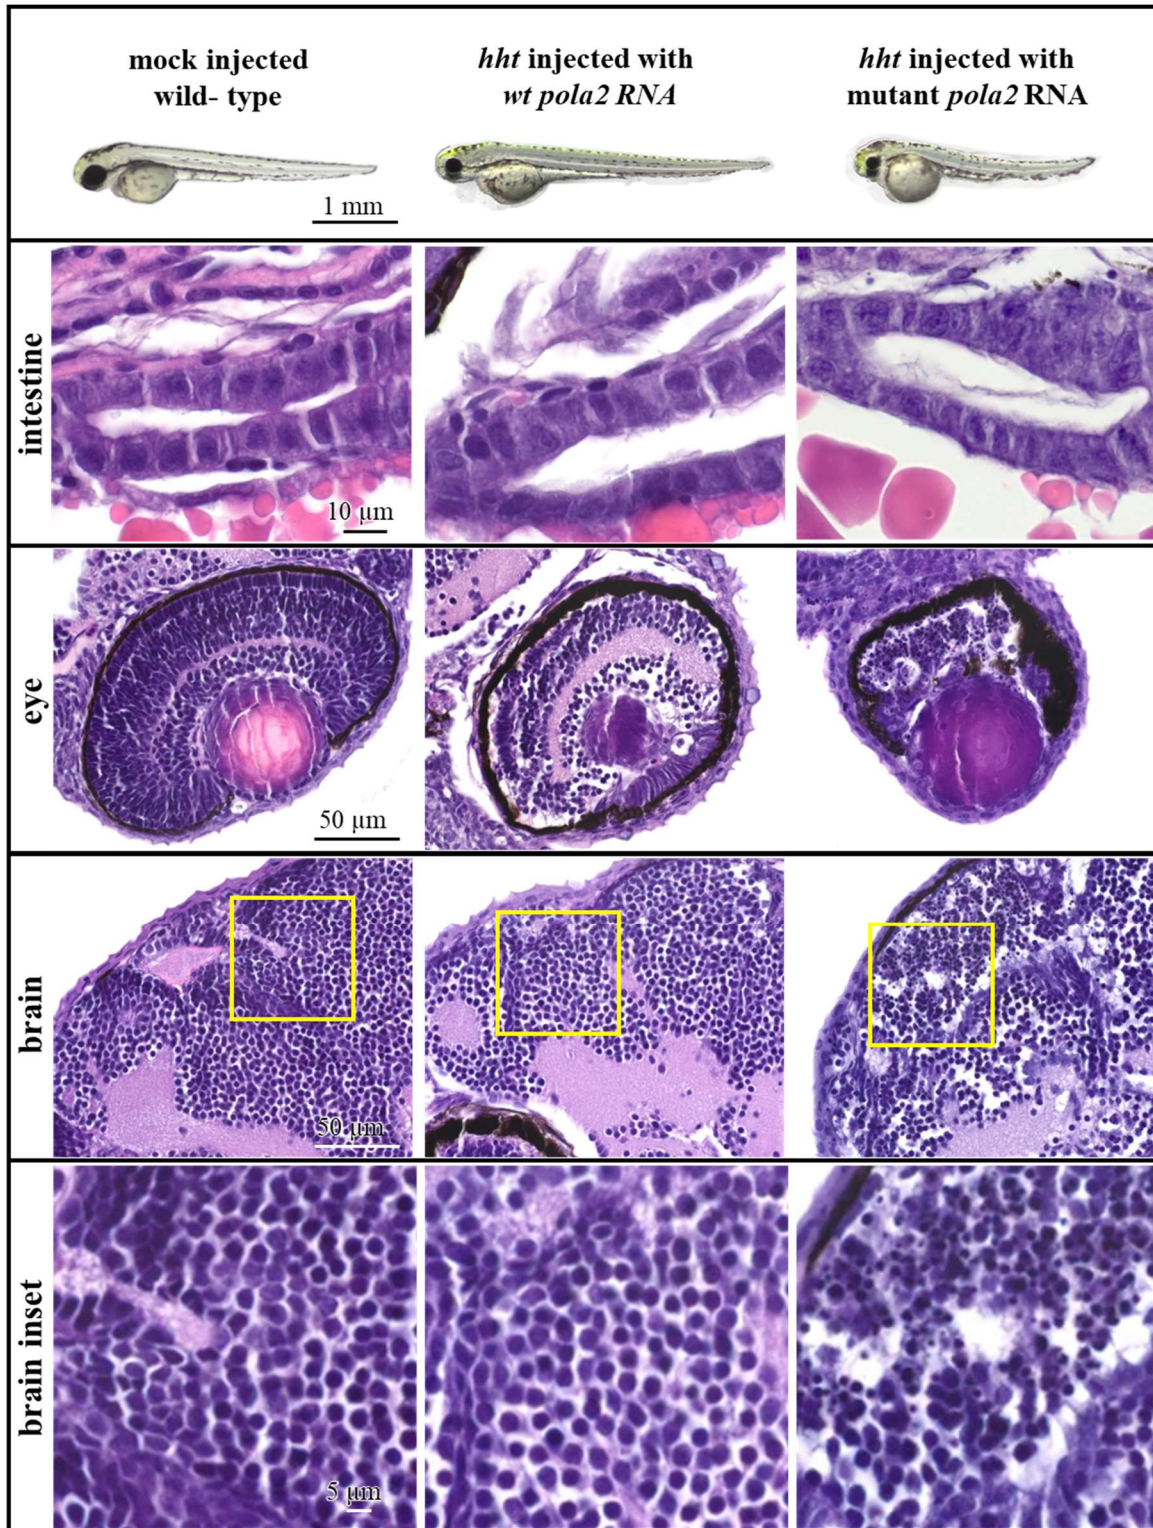

**Figure 4. Wild-type mRNA partially rescues the *hht* phenotype.** Rescued *hht* mutants exhibit a straight body and a normal yolk. Sizes of the eyes and head are intermediate between wild-type and *hht* mutants. Rescued *hht* fish show histologically normal intestinal epithelium and partial preservation of the retinal layering found in wild-type eyes. The eyes and brain of partially rescued *hht* fish injected with *wt* mRNA show no evidence of nuclear fragmentation. Histology sections were imaged at 63X.

148 Another prediction of *pola2* mutation being responsible for the *hht* phenotype is that knockout of  
149 *pola2* on both chromosomes by genome editing would show a *hht* phenotype. Wild-type larvae  
150 were rendered mutant for *pola2* using the CRISPR/Cas9 genome editing system. Homozygous  
151 knockout fish harboring a 16-nucleotide insertion between nucleotides 927-928 (**Supplemental**  
152 **S3A**) exhibited a gross phenotype that was strikingly similar to *hht* (**Supplemental S3B**). The  
153 frameshift in this CRISPR insertion allele disrupts the protein sequence after amino acid 308.  
154 Under the assumption that human and zebrafish POLA2 proteins share similar structures, these  
155 *pola2* knockout zebrafish would produce a mutant protein without a functional phosphodiesterase  
156 (PDE) domain, which has been reported to be important for binding between human POLA2 and  
157 the catalytic A subunit of Pol  $\alpha$ , predicting a null phenotype (Klinge *et al.* 2009, Suwa *et al.* 2015).  
158 The gross phenotypes of *hht* and *pola2* knockout larvae were indistinguishable, further confirming that the  
159 affected gene in *hht* is *pola2*.

160

161 We have established that *hht* is mutant in the *pola2* gene by positional cloning, morpholino  
162 knockdown to generate a similar histological phenotype, CRISPR knockout, and partial rescue  
163 with *pola2* mRNA. Human POLA2 protein, the B subunit of DNA polymerase alpha, is known to  
164 mediate binding of the A catalytic subunit and the chromosome (Suwa *et al.* 2015). As predicted  
165 by this model, insertional mutant of the A subunit, encoded by *pola1*, resulted in gross and  
166 histological brain and eye phenotypes indistinguishable from *hht* mutants (**Supplemental S4**).

167

### 168 *pola2-deficient zebrafish mutants exhibit reduced DNA synthesis*

169 Since *pola2* plays a critical role in DNA replication, we investigated how DNA synthesis was  
170 affected in the *hht* mutants. Wild-type and *hht* larvae between 2 to 5 dpf were assessed for DNA

171 replication by incorporation of 5-ethynyl-2'-deoxyuridine (EdU), a synthetic thymidine analog.  
172 After 30 min of EdU incubation, wild-type larvae exhibited strongly positive EdU staining at all  
173 ages examined. In contrast, *hht* larvae were EdU-negative from 2 to 5 dpf, indicating a reduction  
174 of DNA synthesis below the limits of detection (**Fig. 5**).

175

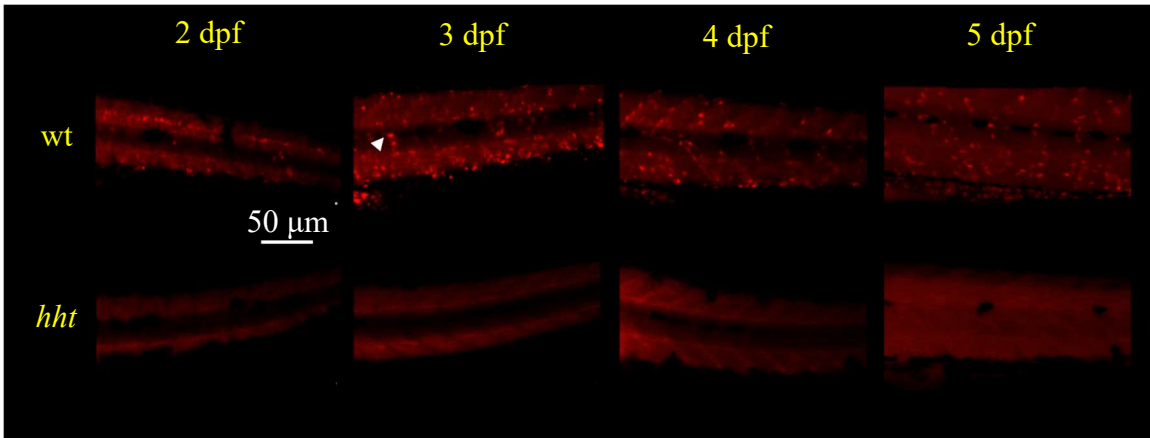

**Figure 5. DNA synthesis is reduced in *hht* larvae.** Representative images of wild-type and *hht* larvae stained with EdU. EdU-positive staining was observed in wild-type larvae, but absent in *hht* larvae at 48, 72, 96, and 120 hpf. 3 larvae were examined for each condition. White arrow = a positive focus.

176

177

178 The observed global reduction of DNA synthesis in *hht* mutants suggests a model in which  
179 inhibition of DNA synthesis by any mechanism can potentially reproduce the *hht* phenotype,  
180 which includes largely normal development up to 24 hpf followed by progressive dysmorphology  
181 and cell death. Based on this timing, we hypothesized that chemical inhibition of DNA synthesis  
182 by multiple mechanisms may be able to phenocopy *hht*, if started at about 24 hpf. To test this idea,  
183 wild-type larvae were exposed to hydroxyurea, an inhibitor of deoxyribonucleotide production, or  
184 aphidicolin, an inhibitor of replicative DNA polymerases  $\alpha$ ,  $\delta$ , and  $\epsilon$  (Zhang *et al.* 2008), beginning  
185 at different times. Wild-type embryos were treated with empirically determined concentrations of  
186 50  $\mu$ M aphidicolin or 150 mM hydroxyurea to induce the *hht* phenotype. Starting inhibition at 2



187 hpf resulted in death by 24 hpf (**Fig. 6A**). Inhibiting DNA synthesis beginning at 24 hpf (but not  
188 before) phenocopied *hht* by 72 hpf (**Fig. 6B**; **Supplemental S5, S6**). Cellular phenotypes in the  
189 eyes, brain, and intestine were confirmed by histology (**Fig. 7**).

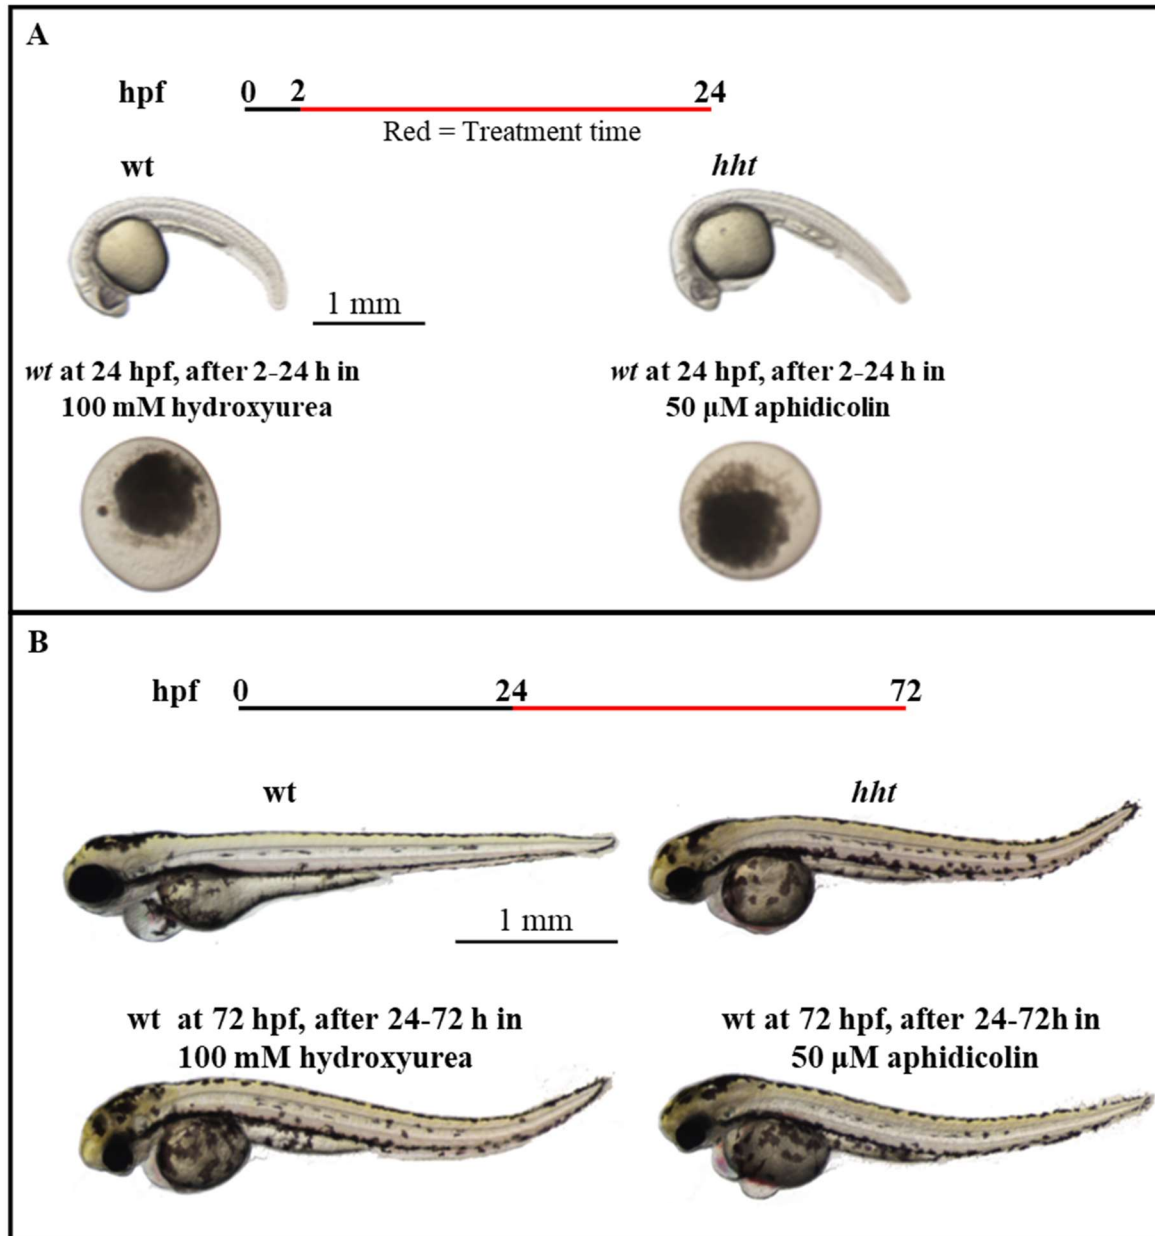

**Figure 6. Chemical inhibition of DNA synthesis in *wt* larvae after 24 hours phenocopies *hht*.** A) Treatment wild-type embryos with 100 mM hydroxyurea or 50 μM aphidicolin from 2 hpf on caused death by 24 hpf. B) Treatment of wild-type larvae (the time maternal *wt pola2* mRNA becomes undetectable) with 100 mM hydroxyurea or 50 μM starting at 24 hpf yields *hht* phenocopies at 72 hpf. Black line = no treatment; red line = treatment.

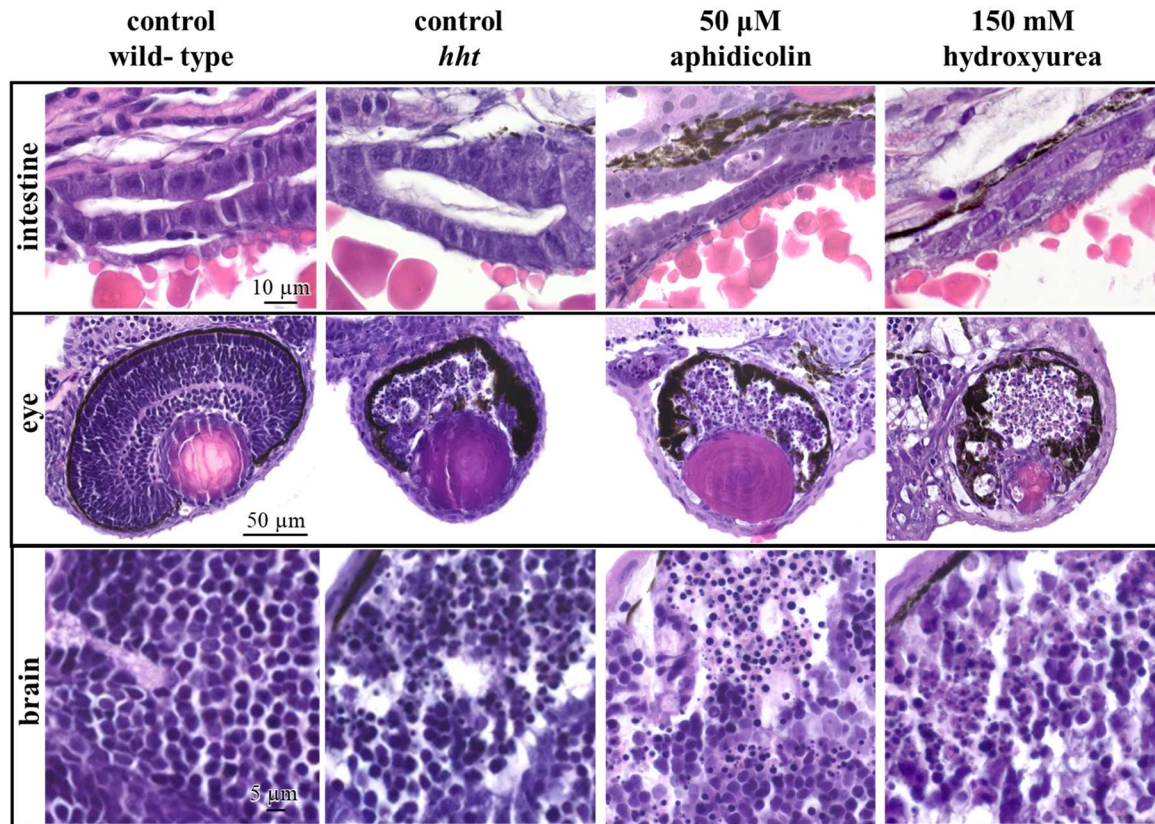

**Figure 7. Chemical inhibition of DNA synthesis starting at 24 hpf phenocopies *hht* cellular phenotypes.** Histology sections were imaged at 63X. Continuous exposure of wild-type larvae to 50  $\mu\text{M}$  aphidicolin or 150 mM hydroxyurea starting at 24 hpf results in nuclear fragmentation in the prefrontal cortex and eyes. Eyes also suffer a drastic reduction in cell number and organization of retinal layers. Cellular and nuclear atypia are observed in the intestine – cell and nuclear sizes are irregular, cell boundaries are obscure, and prominent nucleoli are present.

191  
192 Since inhibition of DNA synthesis predicts cell cycle arrest in S phase, higher proportions of cells  
193 are expected to be in S phase. We measured the proportion of cells in S phase by flow cytometric  
194 measurements of DNA per cell in propidium iodide-labeled cells dissociated from wild-type and  
195 *hht* larvae (**Fig. 8**). At 3 dpf, the proportion of cells in S phase was approximately 3-fold higher in  
196 *hht* ( $45.9 \pm 5.8\%$ ) than in wild-type ( $15.5 \pm 3.2\%$ ;  $p < 0.05$ , t-test). S phase accumulation in *hht*  
197 cells persisted to 5 dpf ( $p < 0.05$ , t-test). In this analysis, all cell types were examined and the  
198 proportion of cells in each phase of the cell cycle represented an average across heterogeneous cell  
199 populations.

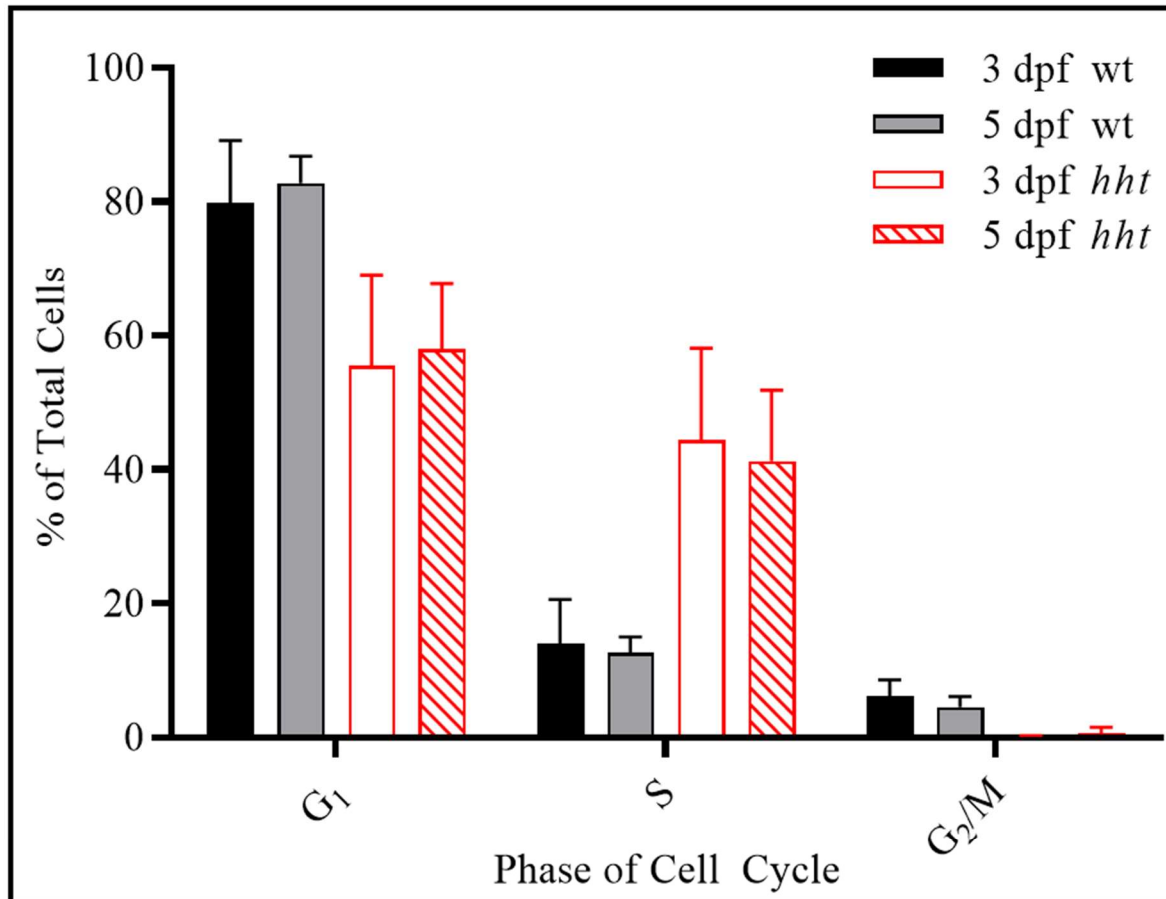

**Figure 8. Accumulation of cells in S phase in *hht*.** Wild-type and *hht* larvae were dissociated into single cells at 3 and 5 dpf, stained with propidium iodide, and analyzed by flow cytometry. Compared to wild-type, the proportion of cells in S phase increased significantly in *hht* at 3 dpf ( $p < 0.05$ ) and persisted to 5 dpf ( $p < 0.05$ ). Error bars = standard error of the mean.

200

### 201 ***Tissue specificity of cell death and DNA damage phenotypes in *hht* zebrafish***

202 Nuclear fragmentation as seen in the eyes of *hht* larvae indicates cell death. To assess the extent  
203 and timing of cell death, live wild-type and *hht* larvae at 24, 36, 48, 72, 96, and 120 hpf were  
204 incubated with acridine orange (AO), a fluorescent vital dye that labels dying cells. There was no  
205 significant difference between the number of AO-positive foci in wild-type and *hht* larvae at 24  
206 hpf but AO-positive foci in *hht* larvae increased dramatically between 24-36 hpf (**Fig. 9A**). After  
207 peaking at 36 hpf, the number of detectable foci in *hht* continued to decline until 120 hpf. In

208 contrast, the number of AO-positive foci in wild-type larvae remained consistently low and was  
209 significantly less than in *hht* larvae - at the 36 hpf peak, the number of AO-positive foci in *hht* was  
210 approximately 4-fold higher than that in wild-type. AO-positive cells in *hht* larvae accumulated  
211 predominantly in the most numerous cell types – those in the brain, eyes, and spinal cord (**Fig. 9B-**  
212 **C**).

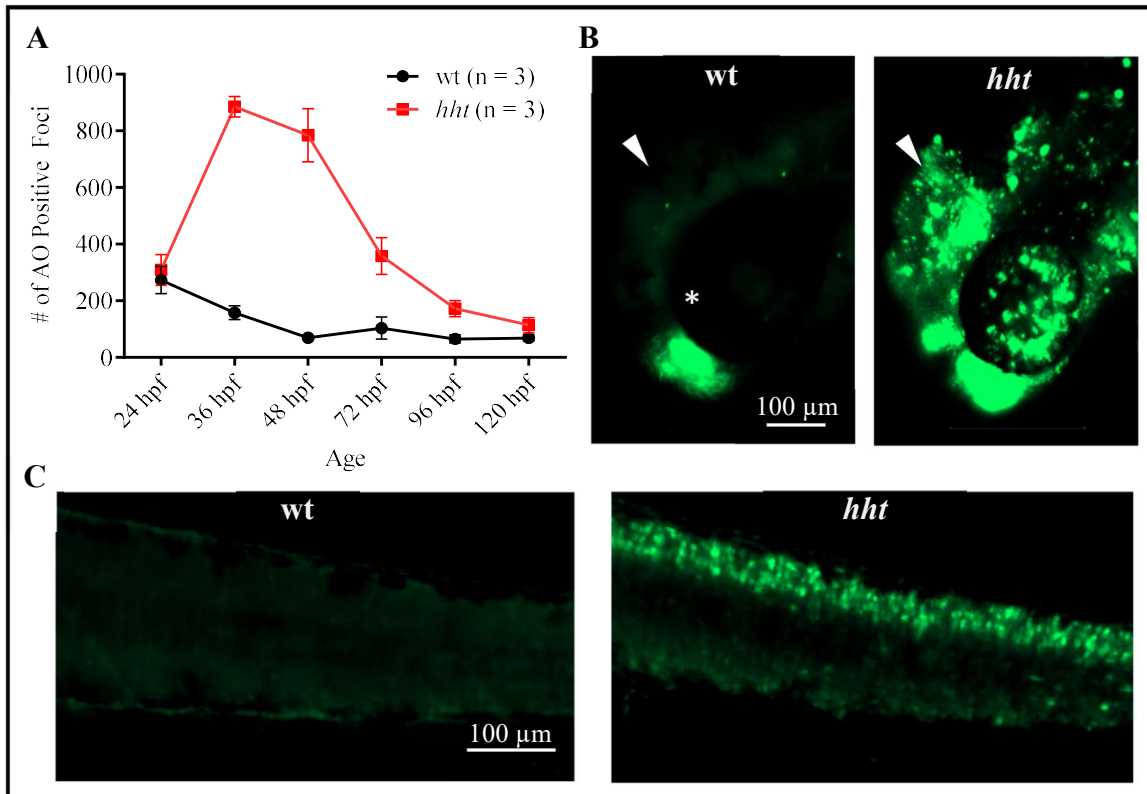

**Figure 9. Acridine orange staining reveals increased cell death in the brain, eyes, and spinal cord of *hht* larvae.** Cell death was assessed by counting the number of acridine orange-positive foci in 3 wild-type and 3 *hht* larvae. **A**) Cell death in *hht* was higher than in wild-type, peaking at 36 hpf. **B**) Cell death localized to the eyes and brain of 48 hpf *hht*. **C**) Cell death in the spinal cord in 48 hpf *hht*. Error bars = standard error of the mean. White arrow: brain, white asterisk: eye.

213

214

215 To assess the induction of double strand DNA breaks, wild-type and *hht* larvae at 24, 36, 48, 72,  
216 96, and 120 hpf were probed with an antibody specific for  $\gamma$ -H2AX, the phosphorylated form of  
217 H2AX, a member of the H2A histone family. H2AX becomes phosphorylated on serine139 in



218 response to double-stranded DNA breaks (DSB, Kuo and Yang 2008). At all ages examined, less  
219 than 30 positive foci were detected per wild-type larva. In contrast, the number of positive  $\gamma$ -H2AX  
220 foci in *hht* was indistinguishable from wild-type at 24 hpf, but increased significantly, from 8- to  
221 13-fold, between 36-120 hpf. (Fig. 10A).  $\gamma$ -H2AX staining predominated in the brain, eyes, and  
222 spinal cord of *hht*, following the pattern of cell death as assessed by AO (Fig. 10B-C).

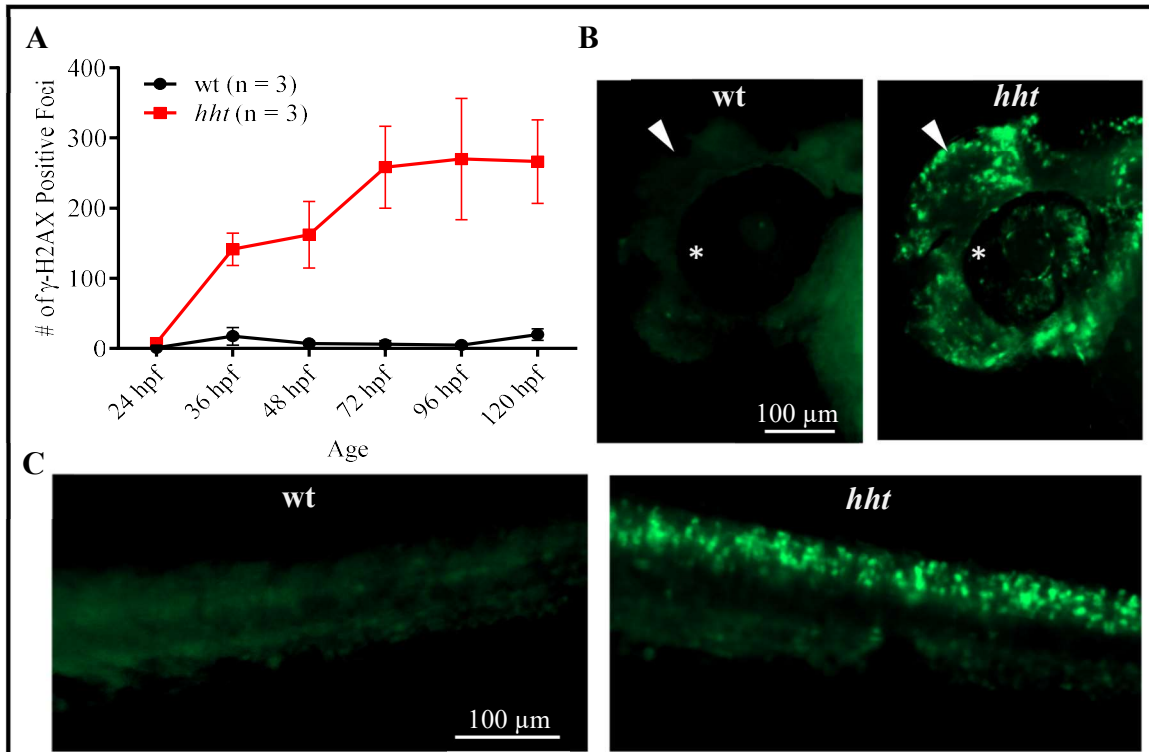

**Figure 10. DNA damage is increased in *hht*.** Double-stranded breaks were assessed by fluorescent antibody staining of  $\gamma$ -H2AX. **A)** DNA damage was minimal in wild-type, but striking in *hht* fish from 36-120 hpf. In 48 hpf *hht* fish, DNA damage was localized to the brain and eyes (B) and spinal cord (C). Error bars = standard error of the mean. White arrow: brain, white asterisk: eye.

223

224

### 225 *Wild-type maternal pola2 mRNA sustains survival of pola2-deficient mutants*

226 To explain the extended survival of *pola2* null mutants of zebrafish compared with the *pola2*-  
227 deficient phenotypes of other model organisms, we hypothesized the presence of wild-type  
228 maternal *pola2* mRNA contributed from the wild-type chromosome of the heterozygous mother's

229 primary oocytes. Wild-type Pola2 protein originating from translation of wild-type maternal *pola2*  
230 mRNA would then support normal DNA replication during early embryogenesis and could be  
231 expected to be progressively diluted as cells divide in the absence of the wild-type gene in *hht*  
232 mutants. This scenario explains the relatively normal appearance of *hht* fish at 24 hpf, followed  
233 by the increasing disruption of development and eventual death at days 5-7 that characterize *hht*  
234 fish. The similarity in *hht* and chemically-inhibited fish phenotypes only after 24 hpf suggested  
235 are consistent with active DNA replication before 24 hpf in *hht* homozygotes.

236  
237 To determine whether maternal wild-type *pola2* mRNA facilitates the survival of *hht* larvae,  
238 cDNA from 3 homozygous wild-type and 3 *hht* embryos at 2.5, 6, 24, 48, and 72 hpf were analyzed  
239 by quantitative allele-specific PCR to detect the presence of wild-type maternal *pola2* mRNA (**Fig.**  
240 **11**). At 2.5 hpf, wild-type *pola2* transcripts were detected at similar levels in wild-type and *hht*  
241 embryos ( $n = 3$ ;  $p > 0.5$ , t-test). By 6 hpf, the quantity of wild-type *pola2* transcripts in *hht* embryos  
242 was significantly reduced compared to wild-type embryos ( $n = 3$ ;  $p < 0.05$ , t-test). Wild-type *pola2*  
243 mRNA was not detected in *hht* larvae at or beyond 24 hpf. Taken together, our results are  
244 consistent with a model in which the presence of wild-type *pola2* mRNA and protein is responsible  
245 for the sustained survival of the *hht* mutants, and that the degree of depletion of *pola2* mRNA and  
246 protein would be dependent upon the number of cell divisions in a given lineage.



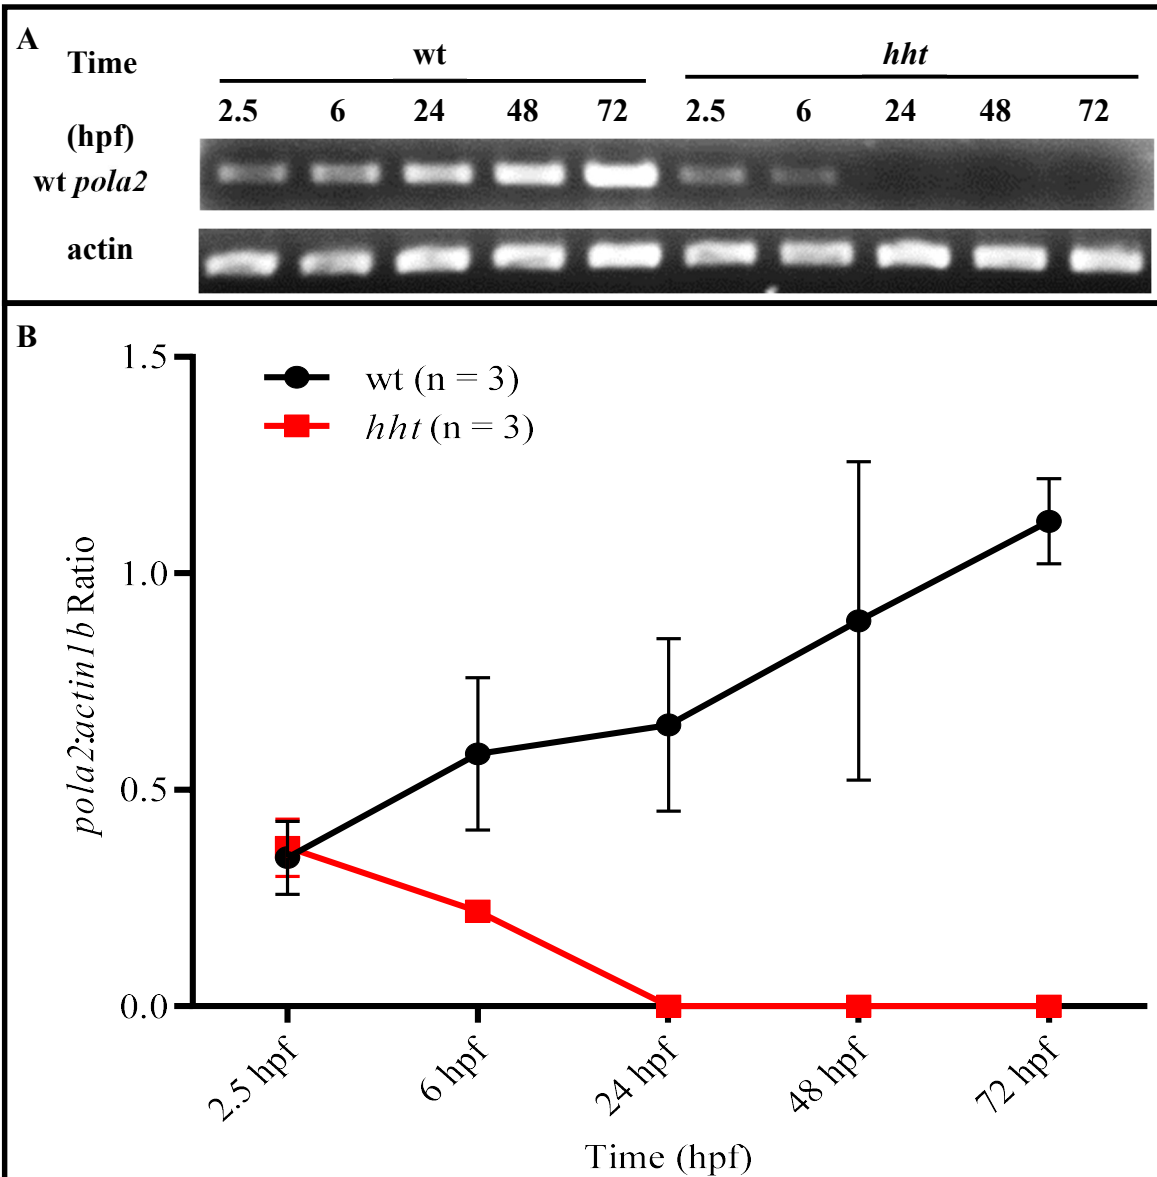

**Figure 11. Wild-type *pola2* mRNA in *hht* embryos becomes undetectable by 24 hpf. A)** Wild-type *pola2* transcripts were detected in *hht* by allele-specific primers at 2.5 and 6 hpf. Wild-type transcripts were not detectable in *hht* after 24 hpf. **B)** Wild-type *pola2* transcripts were normalized to *actin1b*. Wild-type *pola2* transcripts in *hht* embryos were present at comparable levels to wild-type embryos at 2.5 hpf but were significantly reduced compared to wild-type embryos by 6 hpf ( $p < 0.05$ )

247

248

249

## Discussion

250 Despite the clinical importance of nuclear atypia in the diagnosis and prognosis of human cancers,  
251 its mechanistic origins have been unclear. Hyperchromatic hematoxylin staining, often associated  
252 with increased prominence of nucleoli and irregular nuclear shapes, is common in nuclear atypia,  
253 consistent with cancer's frequent association of aneuploid hyperploidy (Rosai 2004). The death  
254 and nuclear fragmentation of brain and retinal cells without detectable prior atypia is consistent  
255 with their normally small, dense nuclei, which makes heterogeneity in chromatin density  
256 inapparent. In contrast, the nuclei of larger cells such as those of the gastrointestinal tract and  
257 organs, are far larger. These larger cells contain the same amount of DNA per cell as cells with  
258 small nuclei, allowing variations in nuclear density to be more readily apparent. The atypical nuclei  
259 of *hht* gut epithelium are consistent with hyperploidy aneuploidy, which is expected with DNA  
260 replication arrest in S phase. Cells trapped in S phase in *hht* mutant cells that are still alive would,  
261 by definition, contain more than 2n DNA content, and therefore be more darkly stained. Our  
262 genetic and chemical data, considered in the context of the association of the atypia associated  
263 with ionizing radiation and viral (in particular, papillomavirus) infection (Blum 1978, Stenbäck  
264 1978, Carr and LiVolsi 1989, Kim *et al.* 2016, Sanfrancesco *et al.* 2013, Kufe *et al.* 2003), indicate  
265 that replicative stress may play the key role in nuclear atypia. Notably, each of these sources of  
266 replicative stress are associated with mutation (Adewoye *et al.* 2015, Gershenson 1986, Santos *et*  
267 *al.* 2011, Hanft *et al.* 2000, Zeeland *et al.* 1982), which, in turn, is necessary for the development  
268 of cancer (Tomlinson *et al.* 1996, Moolgavkar *et al.* 1981, Loeb *et al.* 1990).

269

270 The cell-dependent differences in phenotypes caused by *pola2* deficiency in *hht* mutants can be  
271 attributed to differences in replicative demand prior to the observed cell state. Since homozygous

272 *hht* mutants cannot generate new wild-type *pola2* mRNA, the quantity of wild-type *pola2* mRNA,  
273 and presumably wild-type Pola2 protein, is diluted after each round of cell division (**Fig. 12**). As  
274 shown in our RT-PCR experiment, wild-type *pola2* mRNA is undetectable in *hht* fish by 24 hpf,  
275 leaving only the wild-type Pola2 protein produced before the maternal-to-zygotic transition, to  
276 support growth thereafter. Assuming the quantity of wild-type Pola2 protein in the progenitor cells  
277 for every tissue was the same, and is diluted with each cell division, tissues with a larger number  
278 of cells must have undergone more cell divisions and would therefore contain less wild-type  
279 protein per cell. The striking difference in the cellular disorganization of retinal cells and the  
280 organization of sensory epithelium in the *hht* mutant is readily explained by the retinal cells'  
281 continuing replication vs. the sensory epithelium having reach terminally differentiation by about  
282 24 hours (Dyballa *et al.* 2017). Phenocopying of a proliferation-dependent pattern of pleiotropy  
283 through the timed addition of chemical inhibitors of DNA synthesis is consistent with differential  
284 proliferation rates as the explanation for differential cellular responses to replicative deficiency.

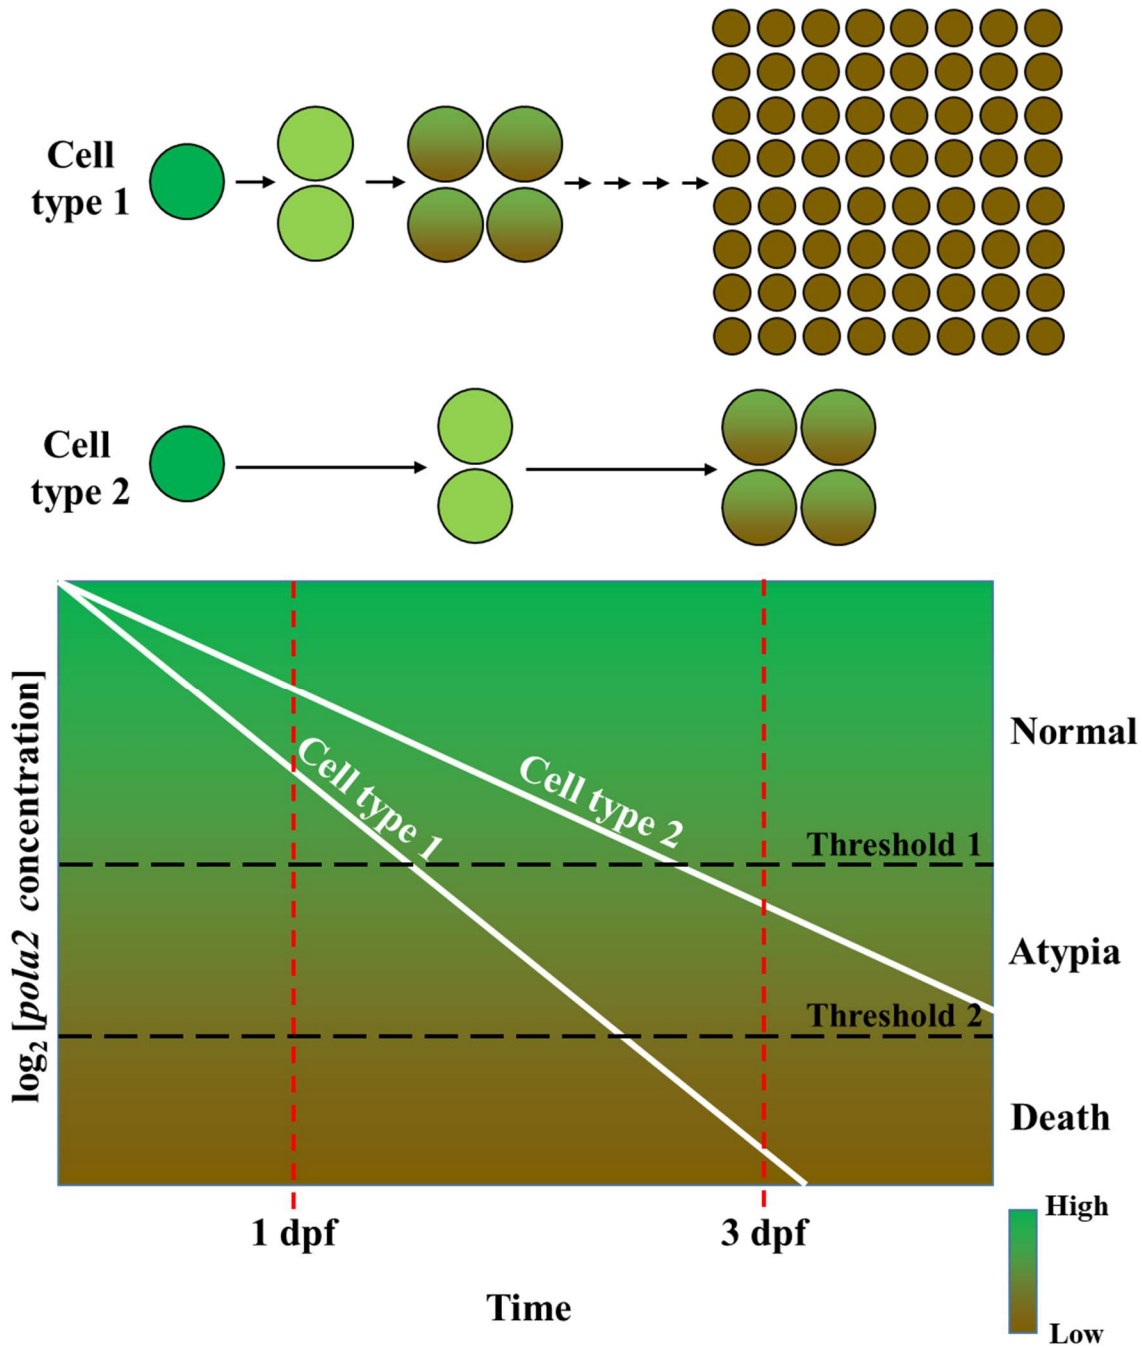

**Figure 12. Differential dilution of *pola2* accounts for tissue-specific differences in nuclear atypia and cell death.** Homozygous *hht* mutant embryos cannot generate wild-type *pola2* mRNA. The quantity of wild-type *pola2* mRNA and protein, is diluted after each round of cell division. In this model, highly proliferative cell types undergo more cell divisions per unit time, resulting in lower concentrations of wild-type *pola2* mRNA or protein per cell compared to cell types that proliferate slowly. Nuclear atypia is apparent in cells with large nuclei but inapparent in cells with small, condensed nuclei.

286 The *pola2* gene encodes the B subunit of Pol  $\alpha$  and does not itself exhibit any known enzymatic  
287 activity. Molecular studies in mouse revealed that the B subunit is tightly associated with the zinc  
288 finger motifs in the carboxy-terminal domain of the catalytic subunit A (Mizuno *et al.* 1999). It  
289 functions as a “molecular tether” that recruits the catalytic polymerase subunit to the origin  
290 recognition complex (ORC) for the initiation of DNA replication (Collins *et al.* 1993; Uchiyama  
291 and Wang 2004). Mutagenesis of the *POL12* gene, encoding the B subunit of Pol  $\alpha$  in yeast,  
292 showed that mutations in the conserved C-terminus of the protein caused either lethality or  
293 temperature sensitivity while mutations in the non-conserved regions in the N-terminus had no  
294 effect (Foiani *et al.* 1995). The B subunit has been shown to be phosphorylated and  
295 dephosphorylated in a cell cycle-dependent manner and this phosphorylation is dependent on its  
296 association with the catalytic subunit (Foiani *et al.* 1995; Ferrari *et al.* 1996). The ability of Pol  $\alpha$  to  
297 initiate DNA replication is maximized when the B subunit is phosphorylated while the N-terminus  
298 of the catalytic subunit A remains unphosphorylated (Schub *et al.* 2001). Other studies have shown  
299 that the B subunit plays a role in telomere maintenance in yeast (Grossi *et al.* 2004) and  
300 reprogramming the regenerative potential of the tail fin of adult zebrafish (Wang *et al.* 2019).

301  
302 In non-vertebrate models, inactivating *pola2* mutations can result in immediate growth arrest (*S.*  
303 *cerevisiae*: Collins *et al.* 1993, Foiani *et al.* 1994, Foiani *et al.* 1995; *Arabidopsis*: Yang *et al.*  
304 2009). Despite the high likelihood that the *hht* zebrafish are null mutants, they exhibit an extended  
305 lifespan of 5-7 dpf. As predicted by our replicative deficiency model, chemical inhibition of DNA  
306 replication in wild-type embryos starting at 1 dpf phenocopied *hht* at 3 dpf. Treatment during early  
307 embryogenesis caused death in wild-type larvae by 1 dpf, suggesting that normal DNA replication  
308 is indeed required during early embryogenesis for the survival of *hht* mutants, just as it is required

309 in yeast and *Arabidopsis*. The detection of wild-type *pola2* mRNA in homozygous mutant embryos  
310 supports our hypothesis that DNA replication during embryonic stages of the mutants requires  
311 wild-type *pola2* mRNA. Since the homozygous mutant embryos have no genomic source for wild-  
312 type *pola2* transcripts, wild-type mRNA must have come from the heterozygous mother (fathers  
313 are also heterozygous but do not contribute mRNA to the oocyte). The maternal-to-zygotic  
314 transition (MZT) designates the time at which the zygotic genome is activated, and maternal  
315 transcripts become destabilized and rapidly degraded. In zebrafish, the transcription of the zygotic  
316 genome begins around 3 hpf, and most of the maternal transcripts are degraded by 6 hpf (Kane  
317 and Kimmel 1993, Schier 2007, Tadros and Lipshitz 2009). The time interval between MZT and  
318 onset of the *hht* mutant phenotype suggests that persistence of the wild-type protein is responsible  
319 for the survival of the mutant. That the pattern of subsequent somatic depletion of wild-type Pola2  
320 protein in *hht* follows the pattern of DNA damage is consistent with our model for explaining the  
321 cell-specific pattern of *hht*'s pleiotropic mutant phenotype.

322

323 The extended lifespan of our *pola2* mutant, *hht*, and its development of time- and tissue-specific  
324 cellular abnormalities created an opportunity to explore the potential role of the progressive loss  
325 of DNA replication in the causation of an important cancer phenotype, nuclear atypia, and more  
326 generally, a frequent consequence of single gene mutations, pleiotropy. We showed that the  
327 progressive pattern of phenotypic change in *hht* can be explained by the initial presence of wild-  
328 type mRNA, followed by its progressive loss in genotypically homozygous mutant zygotes. In the  
329 course of our work, transcriptomic studies of wild-type, unfertilized zebrafish eggs showed that  
330 over 10,000 maternal transcripts are present that include essential genes such as *pola2* (Rauwerda  
331 *et al.* 2016). The present studies suggest that zebrafish mutants for maternally expressed essential



332 genes may provide an opportunity to assess, without bias, both the tissue-specific and potentially  
333 pleiotropic effects of the progressive loss of gene function in the context of the whole animal. It is  
334 worth noting that the tissue-specific phenotypes of *hht* were discovered here using histology, but  
335 that whole-organism, 3-dimensional, pan-cellular, cell-resolution imaging method such as x-ray  
336 histotomography, will be better-suited for the quantitative study of volumetric phenotypes such as  
337 cell and tissue volume and shape across cell types and tissues (Ding *et al.* 2019). The incorporation  
338 of such approaches in the systematic study of pleiotropy may help us to understand patterns of cell  
339 and tissue-specific phenotypes that emerge in the course of disease.

340

## Materials and Methods

341 **Fish lines, mating, and embryo collection.** Generation of ENU-mutagenized mutant *hht* was  
342 previously described (Mohideen *et al.* 2003). The background strain was a wild-type fish line  
343 acquired from the Connors fish farm, which differs from the Tu and AB laboratory strains that are  
344 in common use. The *hht* line is maintained as heterozygotes due to the larval-lethal nature of the  
345 mutation. Mating was carried out by placing male and female heterozygotes in Aquatic habitat  
346 tanks with dividers the afternoon prior to egg collection. Collected eggs were disinfected in 10%  
347 Ovadine (Syndel) for 1 min at room temperature then washed 3 times in charcoal-filtered water.  
348 Larvae were incubated at 28.5° C to maintain consistent speed of development.

349 **Histology.** Procedure for zebrafish histology has been previously described (Copper *et al.* 2018)  
350 Larvae were dechorionated prior to submersion in 10% Neutral Buffered Formalin (Fisher) at 4° C.  
351 Samples were fixed overnight at room temperature with gentle agitation and subsequently  
352 embedded in agarose. For long-term storage, fixative was replaced with 70% ethanol. Agarose-  
353 embedded larvae are subsequently embedded in paraffin, sectioned, and mounted on glass slides.  
354 Sections were stained with hematoxylin and eosin and imaged with Zeiss Axio Imager M.2.

355 **X-ray histotomography.** 3-dimensional images by micro-CT were extracted from the 3d.fish  
356 database created by Ding *et al.* Links to the exact images presented in Figure 2 are provided below.

357 3 dpf wt:

358 [http://3d.fish?s=wt\\_3dpf&r=0&z=sagittal&c=0.09086888387667061,0.07090368892198975,0.4](http://3d.fish?s=wt_3dpf&r=0&z=sagittal&c=0.09086888387667061,0.07090368892198975,0.4822530864197531,0.23534955311213995,0&i=518,317,671&bri=100&con=100&ol=)  
359 [822530864197531,0.23534955311213995,0&i=518,317,671&bri=100&con=100&ol=](http://3d.fish?s=wt_3dpf&r=0&z=sagittal&c=0.09086888387667061,0.07090368892198975,0.4822530864197531,0.23534955311213995,0&i=518,317,671&bri=100&con=100&ol=)

360 5 dpf wt:

361 [http://3d.fish?s=wt\\_5dpf&r=0&z=sagittal&c=0.026697595375619665,0.0606159072099105,0.3](http://3d.fish?s=wt_5dpf&r=0&z=sagittal&c=0.026697595375619665,0.0606159072099105,0.3721088629782046,0.18159687740134256,0&i=152,416,742&bri=100&con=100&ol=)  
362 [721088629782046,0.18159687740134256,0&i=152,416,742&bri=100&con=100&ol=](http://3d.fish?s=wt_5dpf&r=0&z=sagittal&c=0.026697595375619665,0.0606159072099105,0.3721088629782046,0.18159687740134256,0&i=152,416,742&bri=100&con=100&ol=)

363 3 dpf *hht*:

364 [http://3d.fish?s=hht\\_3dpf&r=2&z=sagittal&c=0.08014927360645446,0.3082981561232899,0.8](http://3d.fish?s=hht_3dpf&r=2&z=sagittal&c=0.08014927360645446,0.3082981561232899,0.8)

365 [196371398078974,0.39999999999999997,0&i=647,485,430&bri=100&con=100&ol=](http://3d.fish?s=hht_3dpf&r=2&z=sagittal&c=0.08014927360645446,0.3082981561232899,0.8)

366 5 dpf *hht*:

367 [http://3d.fish?s=hht\\_5dpf&r=0&z=sagittal&c=0.02394390397352475,0.17317734966732362,0.](http://3d.fish?s=hht_5dpf&r=0&z=sagittal&c=0.02394390397352475,0.17317734966732362,0.)

368 [44653063557384554,0.2179162528816111,0&i=210,471,293&bri=100&con=100&ol=](http://3d.fish?s=hht_5dpf&r=0&z=sagittal&c=0.02394390397352475,0.17317734966732362,0.)

369 **Sequencing.** mRNA was extracted from 72 hpf wildtype and *hht* larvae using the RNeasy Mini

370 Kit (Qiagen) and reverse transcribed to cDNA. PCR was performed on cDNA with 3 sets of

371 primers:

372 -23~596:

373 Forward (POLA2F1: TTGAACATCAGAGGACAATA)

374 Reverse (POLA2R1: TCTCCTCCGTCCAGCATCTC)

375 503~1274:

376 Forward (POLA2F2: AGAGGTGGTTTCCACATTTG)

377 Reverse (POLA2R2: ACAATACCAACTTGCATGC)

378 1180~1823:

379 Forward (POLA2F3: ACCAGGTGACAGAAACATTT)

380 Reverse (POLA2R3: TAAAGTTCAAACATTGTATG).

381 PCR was performed on gDNA with 1 set of primer for exon 2 of *pola2*:

382 Forward (POLA2F1: TTGAACATCAGAGGACAATA) anneals to the 5' end of the 2<sup>nd</sup> exon of

383 *pola2*.

384 Reverse (POLA2gR: TGACTCCAAACAATGTTGTACTTTGATAGTCATTTG) anneals to the

385 2<sup>nd</sup> intron of *pola2*.

386 PCR products were purified with the QIAquick PCR purification kit (Qiagen) and submitted to  
387 Genewiz for sequencing.

388 **Genotyping.** Allele-specific primers were designed based on the SNAP primer method described  
389 by Drenkard *et al.* Forward primers span the AC repeats. Wild-type specific primers detect alleles  
390 with only two repeats and mutant specific primers detect alleles with three repeats.

391 Wild-type forward primer (POLA2wtF: CACTTTCAACATAGCCTTCAACAATGACAGC);

392 Mutant forward primer (POLA2mtF: GACACTTTCAACATAGCCTTCAACAATGAGACA);

393 gDNA reverse primer

394 (gPOLA2ASR: TGACTCCAAACAATGTTGTACTTTGATAGTCATTTG).

395 cDNA Reverse primer: (cPOLA2ASR: GCTCCAACATTTTGTCTCGATGGTGCC)

396 **RNA rescue.** Wild-type and mutant *pola2* mRNA was extracted from homozygous wild-type or  
397 homozygous mutant embryos, respectively, from a  $\frac{hht}{+} \times \frac{hht}{+}$  cross with the RNeasy Mini Kit  
398 (Qiagen) and reverse transcribed into cDNAs using the M-MLV Reverse Transcriptase kit  
399 (ThermoFisher). cDNA from wild-type embryos were subjected to allele-specific PCR to eliminate  
400 heterozygotes. cDNAs were amplified by PCR with the following primers:

401 Forward primer (POLA2-BglIIF): AGATCTTTGAACATCAGAGGACAATA

402 Reverse Primer (POLA20MluIR): ACGCGTTAAAGTTCAAACATTGTATG

403 and cloned into PCR®II-TOPO® vectors for sequencing. After sequences are verified, the inserts  
404 are subcloned into PT3TS(4) vectors. Plasmid DNA was extracted from competent cells with the  
405 QIAprep Spin Miniprep Kit (Qiagen) and linearized with XmaI. mRNA was generated from the  
406 linearized plasmids with the T3 RNA polymerase (NEB). 200 pg of wild-type or mutant *pola2*  
407 mRNA were injected into embryos from a  $\frac{hht}{+} \times \frac{hht}{+}$  cross at the 1-cell stage. All injected embryos

408 in the first round of rescue experiments were genotyped to ensure that no phenotypic wild-type  
409 larvae were genotypically *hht*.

410 **CRISPR/Cas9 knockout.** Gene-specific primer was designed for *pola2* and annealed to a universal  
411 primer containing the sgRNA scaffold as described in protocol provided by Dr. Wenbiao Chen's  
412 lab at Vanderbilt University. 1  $\mu$ L of 10  $\mu$ M gene-specific primer was mixed with 1  $\mu$ L of 10  $\mu$ M  
413 sgRNA scaffold primer, 2.5  $\mu$ L 2X NEB buffer 2 with BSA and annealed at 98° C for 1 min then  
414 cooled to 37° C with a ramp speed of 0.1° C/sec. 0.5  $\mu$ L of 500  $\mu$ M dNTP and 0.5  $\mu$ L of T4 DNA  
415 polymerase were added to the mixture and incubated for 20 min. T4 DNA polymerase was then  
416 inactivated by incubation at 75° C for 20 min. sgRNA was synthesized using the MaxiScrip T7 kit  
417 (ThermoFisher Scientific). 1  $\mu$ L of Turbo Dnase I was added and incubated at 37° C for 15 min to  
418 remove residual DNA primers. sgRNA was purified using the mirVANA kit (ThermoFisher  
419 Scientific). 600 ng/ $\mu$ L Cas9 protein was mixed with either 100 ng/ $\mu$ L *pola2* sgRNA and injected  
420 into wild-type zebrafish embryo at 1-cell stage.

421 *pola2*KO: ATTAATACGACTCACTATAGGGGTCGCGCTGGATGGGGAAgttttagctagaatagc;  
422 sgRNA scaffold: ttttgcaccgactcgggtgccacttttcaagtTgataaCggactagcctattttaacttgctatttctagctctaaac

423 **Cell cycle analysis.** 20 wild-type and *hht* larvae were collected at 3 and 5 dpf and dissociated into  
424 single cells. Cells were resuspended in 2 mL 70% EtOH at room temperature for 10 min to fix  
425 then stored at 4° C before use. Cells were centrifuged at 500 x g for 5 min to remove supernatant.  
426 1 mL propidium iodide solution from DNA QC Particles Kit (BD) was added to each cell mixture.  
427 Cells were sorted with FACSCalibur (BD) and cell cycle was analyzed using ModFit LT V3.3.11.

428 **EdU staining.** For labeling of proliferating cells, 2, 3, 4, and 5 dpf wildtype and *hht* larvae were  
429 incubated for 30 min at 28.5° C in 400  $\mu$ M EdU solution (Life Technologies). Larvae were  
430 incubated in charcoal-filtered water for 30 min at 28.5° C, then fixed immediately in cold 10%

431 neutral buffered formalin. Detection of EdU incorporation was performed according to  
432 manufacturer's instructions. Samples were visualized with Axio Zoom.V16 fluorescence stereo  
433 microscope (Zeiss).

434 **Chemical inhibition.** Wild-type embryos were submerged in charcoal-filtered water, hydroxyurea  
435 (Sigma-Aldrich), or aphidicolin (Sigma-Aldrich) at 0, 2, 6 hpf or 24 hpf. For the 24 hpf treatment,  
436 fresh solutions were administered at 48 hpf. Hydroxyurea was dissolved in deionized water to  
437 prepare a 500 mM stock and aphidicolin was dissolved in DMSO to prepare a 10mM stock. Stock  
438 solutions were diluted to appropriate concentrations for each experimental condition so that equal  
439 volume was added.

440 **Acridine orange staining.** 24, 36, 48, 72, 96, and 120 hpf wildtype and *hht* larvae were incubated  
441 in 2 µg/mL acridine orange for 30 min at 28.5° C, then washed for 5 min in charcoal-filtered water  
442 for 5 min at 28.5° C. Larvae were visualized with Axio Zoom.V16 fluorescence stereo microscope  
443 (Zeiss).

444 **γ-H2AX staining.** 24, 36, 48, 72, 96, and 120 hpf wildtype and *hht* larvae were fixed in cold 10%  
445 neutral buffered formalin. Samples were permeablized in acetone at -20 °C for 7 min then washed  
446 with distilled water for 5 min followed by two washes in PBS for 10 min. Samples were then  
447 blocked in 5% goat serum for 1 hr at room temperature and incubated in 1:100 γ-H2AX primary  
448 antibody (Genetex) overnight at 4 °C. After 3 washes in PBST for 15 min, samples were incubated  
449 in 1:1000 Alexa Fluor 488 goat anti-rabbit secondary antibody (Life Technologies) for 3 hrs at  
450 room temperature. After 3 washes in PBST for 15 min, samples were visualized with Axio  
451 Zoom.V16 fluorescence stereo microscope (Zeiss).

452 **Wildtype *pola2* transcript detection.** DNA and RNA were extracted from 2.5, 6, 24, 48, and 72  
453 hpf embryos with AllPrep DNA/RNA Mini Kit (Qiagen). Embryos were genotyped with allele-



454 specific PCR. RNA of genotyped homozygous wild-type and *hht* embryos were reverse transcribed  
455 with oligo-dT. Quantitative PCR was performed on cDNA with allele-specific primers for wild-  
456 type *pola2* and *actinb1*:  
457 Forward (Actinb1F: CATCCGTAAGGACCTGTATGCCAAC)  
458 Reverse (Actinb1R: AGGTTGGTCGTTTCGTTTGAATCTC)  
459 as loading control.  
460 PCR products from three homozygous wild-type and mutant embryos were subjected to  
461 electrophoresis. Relative quantity was calculated by densitometry as a ratio of *pola2*  
462 product:*actinb1* product.

463  
464  
465  
466  
467  
468  
469  
470  
471  
472  
473  
474  
475  
476  
477  
478  
479  
480  
481  
482  
483  
484  
485

## Reference

1. Adewoye, A. B., Lindsay, S. J., Dubrova, Y. E., and M. E. Hurles, 2015. The genome-wide effects of ionizing radiation on mutation induction in mammalian germline. *Nat Commun.* Mar 26; 6:6684. doi: 10.1038/ncomms7684.
2. Billings, S. D. and J. R. Goldblum, 2010. Soft Tissue tumors and tumor-like reactions. *Dermatopathology*. New York, NY: Saunders, an imprint of Elsevier Inc. 499-564.
3. Blum, H. F., 1978. Ultraviolet radiation and skin cancer in mice and men: accumulation of effect and uncertainty of prediction. *Natl Cancer Inst Monogr.* Dec; 50:11-2
4. Calero-Cuenca, F. J., Janota, C. S., and E. R. Gomes, 2018. Dealing with the nucleus during cell migration. *Curr Opin Cell Biol.* **50**: 35-41.
5. Carr, R. F. and V. A. Livolsi, 1989. Morphologic changes in the thyroid after irradiation for Hodgkin's and non-Hodgkin's lymphoma. *Cancer.* Aug 15; 64(4): 825-9
6. Collins, K. L., A. A. Russo, B. Y. Tseng, and T. J. Kelly, 1993. The role of the 70 kDa subunit of DNA polymerase alpha in DNA replication. *EMBO J.* 12: 4555-4566
7. Copper, J. E., Budgeon, L. R., Foutz, C. A., van Rossum, D. B., Vanselow, D. J., Hubley, M. J., Clark, D. P., Mandrell, D. T., and K. C. Cheng, 2018. Comparative analysis of fixation and embedding techniques for optimized histological preparation of zebrafish. *Comp Biochem Physiol C Toxicol Pharmacol.* Jun; **208**: 38-46.
8. Ding, Y., Vanselow, D. J., Yakovlev, M. A., Katz, S. R., Lin, A. Y., Clark, D. P., Vargas, P., Xin, X., Copper, J. E., Canfiend. V. A., Ang, K. C., Wang, Y., Xiao, X., De Carlo, F., van Rossum, D. B., La Riviere, P., and K. C. Cheng, 2019. Computational 3D histological phenotyping of whole zebrafish by X-ray histotomography. *eLife.* 8:e44898. doi: 10.7554/eLife.44898

- 486 9. Drenkard, E., Richter, B. G., Rozen, S., Stutius, L. M., Angell, N. A., Mindrinos, M., Cho,  
487 R. J., Oefner, P. J., Davis, R. W., and F. M. Ausubel, 2000. A simple procedure for the  
488 analysis of single nucleotide polymorphisms facilitates map-based cloning in *Arabidopsis*.  
489 *Plant Physiol.* Dec; 124(4): 1483-92. doi: 10.1104/pp.124.4.1483.
- 490 10. Dyballa, S., Savy, T., Germann, P., Mikula, K., Remesikova, M., Špir, R., Zecca, A.,  
491 Peyri ras, N., and C. Pujades, 2017. Distribution of neurosensory progenitors pools during  
492 inner ear morphogenesis unveiled by cell lineage reconstruction. *eLife*. Jan 4;6:e22268.  
493 doi: 10.7554/eLife.22268.
- 494 11. Encalada, S. E., P. R. Martin, J. B. Phillips, R. Lyczak, D. R. Hamill *et al*, 2000. DNA  
495 replication defects delay cell division and disrupt cell polarity in *Caenorhabditis elegans*  
496 embryos. *Dev. Biol.* 15: 225-238
- 497 12. Foiani, M., F. Marini, D. Gamba, G. Lucchini, and P. Plevani, 1994. The B subunit of the  
498 DNA polymerase alpha-primase complex in *Saccharomyces cerevisiae* executes an  
499 essential function at the initial stage of DNA replication. *Mol. Cell Biol.* 13: 923-933
- 500 13. Foiani, M., G. Liberi, G. Lucchini, and P. Plevani, 1995. Cell cycle-dependent  
501 phosphorylation and dephosphorylation of the yeast DNA polymerase alpha-primase B  
502 subunit. *Mol. Cell Biol.* 15: 883-891
- 503 14. Ferrari, M., G. Lucchini, P. Plevani, and M. Foiani, 1996. Phosphorylation of the DNA  
504 polymerase alpha-primase B subunit is dependent on its association with the p180  
505 polypeptide. *J. Biol. Chem.* 271: 8661-8666
- 506 15. Gershenson, S. M., 1986. Viruses as environmental mutagenic factors. *Mutat Res.* May;  
507 167(3):203-13. doi: 10.1016/0165-1110(86)90030-8.

- 508 16. Goh, K. I., Cusick, M. E., Valle, D., Childs, B., Vidal, M., and A. L. Barabási, 2007. The  
509 human disease network. *Proc Natl Acad Sci U.S.A.* May 22; **104** (21): 8685-8690. doi:  
510 10.1073/pnas.0701361104
- 511 17. Grossi, S., Puglisi, A., Dmitriev, P.V., Lopes, M., Shore, D. 2004. Pol12, the B subunit of  
512 DNA polymerase  $\alpha$ , functions in both telomere capping and length regulation. *Genes Dev.*  
513 18(9):992-1006
- 514 18. Hanft, V. N., Fruchtman, S. R., Pickens, C. V., Rosse, W. F., Howard, T. A., and R. E.  
515 Ware, 2000. Acquired DNA mutations associated with *in vivo* hydroxyurea exposure.  
516 *Blood*. Jun 1; 95(11): 3589-93.
- 517 19. Ittisoponpisan, S., Alhuzimi, E., Sternberg, M. J. E., and A. David, 2017. Landscape of  
518 pleiotropic proteins causing human disease: structural and system biology insights. *Hum*  
519 *Mutat.* Mar; **38** (3): 289-296. doi: 10.1002/humu.23155
- 520 20. Jevtić, P., Edens, L. J., Vuković, L. D., and D. L. Levy, 2014. Sizing and shaping the  
521 nucleus: mechanisms and significance. *Curr Opin Cell Biol.* 28: 16-27.
- 522 21. Kane, D.A. and C. B. Kimmel, 1993. The zebrafish midblastula transition. *Development.*  
523 119:447-56.
- 524 22. Kim, E. K., Yoon, G., and H. S. Kim, 2016. Chemotherapy-induced endometrial pathology:  
525 mimicry of malignancy and viral endometritis. *Am J Transl Res.* 8(5): 2459-2467
- 526 23. Klinge, S., Núñez-Ramírez, R., Llorca, O., and L. Pellegrini, 2009. 3D architecture of DNA  
527 Pol  $\alpha$  reveals the functional core of multi-subunit replicative polymerases. *EMBO J.* **28**:  
528 1978-1987.
- 529 24. Kodota, K., Nitadori, J., Woo, K. M., Sima, C. S., Finley, D. J., Rusch, V. W., Adusumilli,  
530 P. S., and W. D. Travis, 2014. Comprehensive pathological analyses in lung squamous cell

- 531 carcinoma: single cell invasion, nuclear diameter and tumor budding are independent  
532 prognostic factors for worse outcomes. *J Thorac Oncol.* **9** (8): 1126-1139
- 533 25. Kufe, D. W., Pollock, R. E., Weichselbaum, R. R., Bast, R. C., Gansler, T. S., Holland, J.  
534 F., and E. Frei, 2003. *Holland-Frei Cancer Medicine, 6<sup>th</sup> Edition*. Hamilton (ON): BC  
535 Becker. ISBN-10: 1-55009-213-8
- 536 26. Kumar, V., Abbas, A. K., Fausto, N., and J. C. Aster, 2010. *Robbins and Cotran Pathologic*  
537 *Basis of Disease* 8<sup>th</sup> edition. Philadelphia, PA: Saunders, an imprint of Elsevier Inc.
- 538 27. Kuo, L. J. and L. X. Yang, 2008. Gamma-H2AX – a novel biomarker for DNA double-  
539 strand breaks. *In Vivo.* **22** (3): 305-9.
- 540 28. Lanzkowsky, P., Lipton, J. M., and J. D. Fish, 2016. *Lanzkowsky's Manual of Pediatric*  
541 *Hematology and Oncology*. Cambridge, MA: Academic Press, an imprint of Elsevier Inc.
- 542 29. Loeb, L. A. and K. C. Cheng, 1990. Errors in DNA synthesis: a source of spontaneous  
543 mutations. *Mutat Res.* May; **238**(3): 297-304. doi: 10.1016/0165-1110(90)90021-3.
- 544 30. Manimaran, D., Karthikeyan, T. M., Khan, D. M., and R. T. Raman, 2014. Follicular  
545 variant of papillary thyroid carcinoma: cytological indicators of diagnostic value. *J Clin*  
546 *Diagn Res.* **8**(3): 46-48
- 547 31. Mizuno, T., Yamagishi, K., Miyazawa, H., and F. Hanaoka, 1999 Molecular architecture  
548 of the mouse DNA polymerase  $\alpha$ -primase complex. *Mol Cell Biol.* **19**(11):7886-96
- 549 32. Mohideen, M. P. K., Beckwith, L. G., Tsao-Wu, G. S., Moore, J. L., Wong, A. C. C.,  
550 Chinoy, M. R., and K. C. Cheng, 2003 Histology-based screen for zebrafish mutants with  
551 abnormal cell differentiation. *Developmental Dynamics.* **228**:414-423
- 552 33. Moolgavkar, S. H. and A. G. Knudson Jr., 1981. Mutation and cancer: a model for human  
553 carcinogenesis. *J Natl Cancer Inst.* Jun; **66**(6): 1037-52. doi: 10.1093/jnci/66.6.1037.

- 554 34. Pizzorno, J. E., Murray, M. T., and H. Joiner-Bey, 2016. *The Clinician's Handbook of*  
555 *Natural Medicine* 3<sup>rd</sup> edition. London, England: Churchill Livingstone, an imprint of  
556 Elsevier Inc.
- 557 35. Poropatich, K., Yang, J. C., Goyal, R., Parini, V., and X. J. Yang, 2016. Nuclear size  
558 measurement for distinguishing urothelial carcinomas from reactive urothelium on tissue  
559 sections. *Diagn Pathol.* 11(1): 57.
- 560 36. Rauwerda, H., Wackers, P., Pagano, J. F., de Jong, M., Ensink, W., Dekker, R., Nehrdich,  
561 U., Spaink, H. P., Jonker, M., and T. M. Breit, 2016. Mother-Specific Signature in the  
562 Maternal Transcriptome Composition of Mature, Unfertilized Zebrafish Eggs. *PLoS*  
563 *One.* Jan 22;11(1):e0147151
- 564 37. Rosai, J., 2004. *Rosai and Ackerman's Surgical Pathology*. Maryland Heights: MO; Mosby,  
565 an affiliate of Elsevier Inc.
- 566 38. Sanfrancesco, J., Jones, J. S., and D. E. Hansel, 2013. Diagnostically challenging cases:  
567 what are atypia and dysplasia? *Urol Clin North Am.* May; **40**(2): 281-293  
568 doi: 10.1016/j.ucl.2013.01.006.
- 569 39. Santos, J. L., Bosquesi, P. L., Almeida, A. E., Chin, C. M., and E. A. Varanda, 2011.  
570 Mutagenic and genotoxic effect of hydroxyurea. *Int J Biomed Sci.* Dec; 7(4):263-267.
- 571 40. Schier, A.F. 2007. The maternal-zygotic transition: death and birth of RNAs. *Science.*  
572 316:406-7
- 573 41. Schub, O., Rohaly, G., Smith, R.W.P., Schneider, A., Dehde, S., Dornreiter, I., Nasheuer,  
574 H.P. 2001. Multiple phosphorylation sites of DNA polymerase  $\alpha$ -primase cooperate to  
575 regulate the initiation of DNA replication *in vitro*. *J Biol Chem.* 276(41):38076-83.

- 576 42. Shimoda, N., Knapik, E. W., Ziniti, J., Sim, C., Yamada, E., Kaplan, S., Jackson, D., de  
577 Sauvage, F., Jacob, H., and M. C. Fishman, 1999. Zebrafish genetic map with 2000  
578 microsatellite markers. *Genomics*. Jun 15;58(3): 219-32. doi: 10.1006/geno.1999.5824.
- 579 43. Stenbäck, F., 1978. Life history and histopathology of ultraviolet light-induced skin  
580 tumors. *Natl Cancer Inst Monogr*. Dec; 50: 57-70.
- 581 44. Suwa, Y., Gu, J., Baranovskiy, A. G., Babayeva, N. D., Pavlov, Y. I., and T. H. Tahirov,  
582 2015. Crystal structure of the human Pol  $\alpha$  B subunit in complex with the C-terminal  
583 domain of the catalytic subunit. *J Biol Chem*. **290** (23): 14328-14337.
- 584 45. Tadros, W. and H. D. Lipshitz, 2009. The maternal-to-zygotic transition: a play in two  
585 acts. *Development*. 136:3033-42
- 586 46. Tomlinson, I. P. M., Novelli, M. R., and W. F. Bodmer, 1996. The mutation rate and cancer.  
587 *Proc Natl Acad Sci U. S. A*. Dec 10; 93(25): 14800-14803. doi: 10.1073/pnas.93.25.14800.
- 588 47. Uchiyama, M. and T. S. Wang, 2004 The B-subunit of DNA polymerase alpha-primase  
589 associates with the origin recognition complex for initiation of DNA replication. *Mol. Cell*  
590 *Biol*. 24: 7419-7434
- 591 48. Wang, Y. T., Tseng, T. L., Kuo, Y. C., Yu, J. K., Su, Y. H., Poss, K. D., and C. H. Chen,  
592 2019. Genetic reprogramming of positional memory in a regenerating appendage. *Curr*  
593 *Biol*. Dec 16;29(24):4193-4207.e4. doi: 10.1016/j.cub.2019.10.038. Epub 2019 Nov 27.
- 594 49. Yamaguchi, T., Kawahara, A., Hattori, S., Taira, T., Abe, H., Sanada, S., Akiba, J., Nishio,  
595 S., Ushijima, K., Kamura, T., and M. Kage, 2015. Cytological nuclear atypia classification  
596 can predict prognosis in patients with endometrial cancer. *Cytopathology*. 26 (3): 157-66.
- 597 50. Yang, H., D. Xiang, S. P. Venglat, Y. Cao, E. Wang *et al*, 2009 *PolA2* is required for  
598 embryo development in *Arabidopsis*. *Botany*. 87: 626-634



599 51. Zeeland, A. A. V., Bussmann, C. J., Degrassi, F., Filon, A. R., Leeuwen, A. C. V. K.,  
600 Palitti, F., and A. T. Natarajan, 1982. Effects of aphidicolin on repair replication and  
601 induced chromosomal aberrations in mammalian cells. *Mutat Res.* Feb 22; 92(1-2): 379-  
602 92. doi: 10.1016/0027-5107(82)90237-8.

603 52. Zhang, L., Kendrick, C., Jülich, D. and S. A. Holley, 2008. Cell cycle progression is  
604 required for zebrafish somite morphogenesis but not segmentation clock function.  
605 *Development.* 135 (12): 2065-2070.

606

### 607 **Acknowledgements**

608 **General:** We thank Margaret Hubley, Gail Broda, and Kathryn Early for help in maintaining wild-  
609 type and mutant zebrafish lines and generating embryos; Jean Copper and Lynn Budgeon for help  
610 in development of zebrafish histology. **Funding:** This work was supported by NIH: 5R01  
611 AR052535 (PI: KCC) and the Jake Gittlen Laboratories for Cancer Research. **Author**  
612 **contributions:** The project was conceived by KCC; research design was by AYL and KCC;  
613 experiments were done by AYL and GKT; analysis was by AYL, GKT, and KCC; AYL and KCC  
614 wrote the paper; KCA, DBVR, and VAC contributed to experimental design and editing. Finally,  
615 we would like to thank Dr. Larry Loeb for his encouragement during the conception of this project.

616 **Competing interest:** The authors declare no conflict of interest.

617

### Supplementary Materials

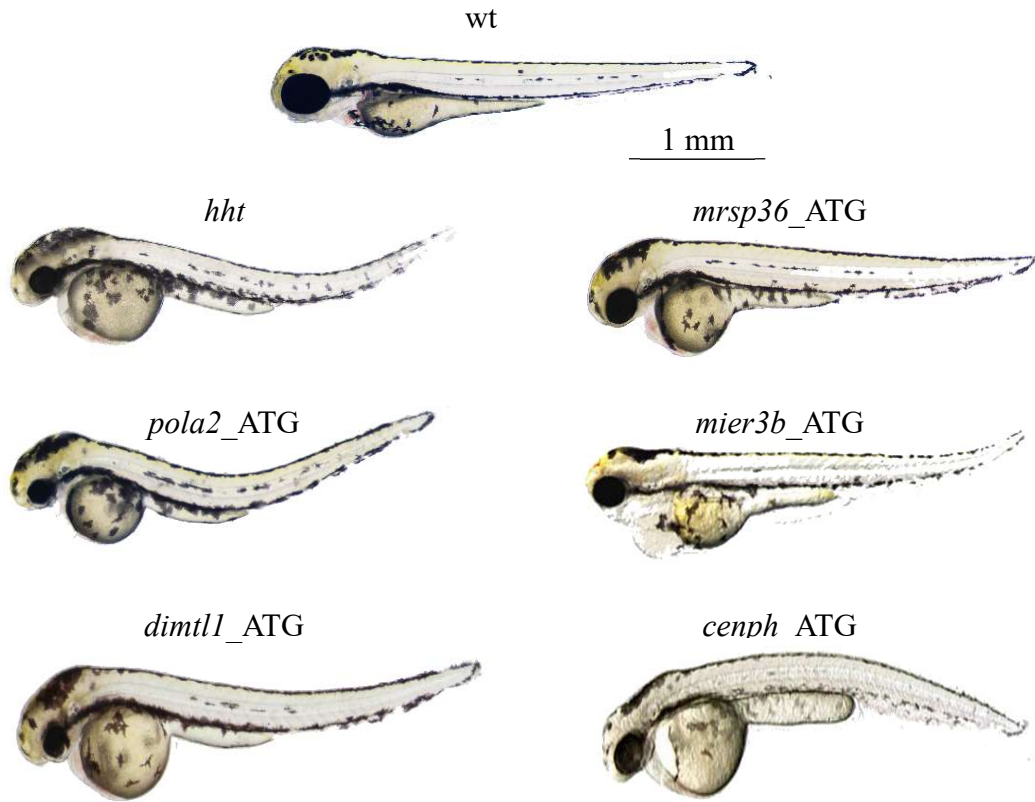

**Supplemental S1.** Morphants of the five candidate genes in the region identified by positional cloning, *mier3b*, *mrps36*, *cenph*, *pola2*, and *dimt11*. Only *pola2* and *dimt11* morphants exhibit a combination of small eyes, enlarged yolk, and dorsal curvature characteristic of *hht* mutants.

618

619

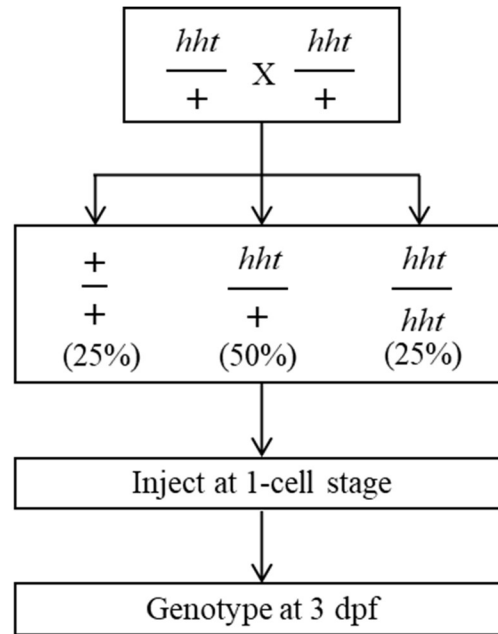

**Supplemental S2. Wild-type *pola2* mRNA rescue schematic.** Wild-type *pola2* mRNA was injected into 1-cell stage embryos from a  $\frac{hht}{+} \times \frac{hht}{+}$  cross. Larvae were genotyped to confirm that rescued larvae were homozygous for the *hht* mutation.

622

**A**

```

wt   GTTGGTTGTCATGGAAGGTATGAATCCCTC-----GGGGGAGAAGCTTGTTC
    |||||
hht  GTTGGTTGTCATGGAAGGTATGAATCCATGACAACAGGGGGGAGAAGGGGGAGAAGCTTGTTC

```

**B**

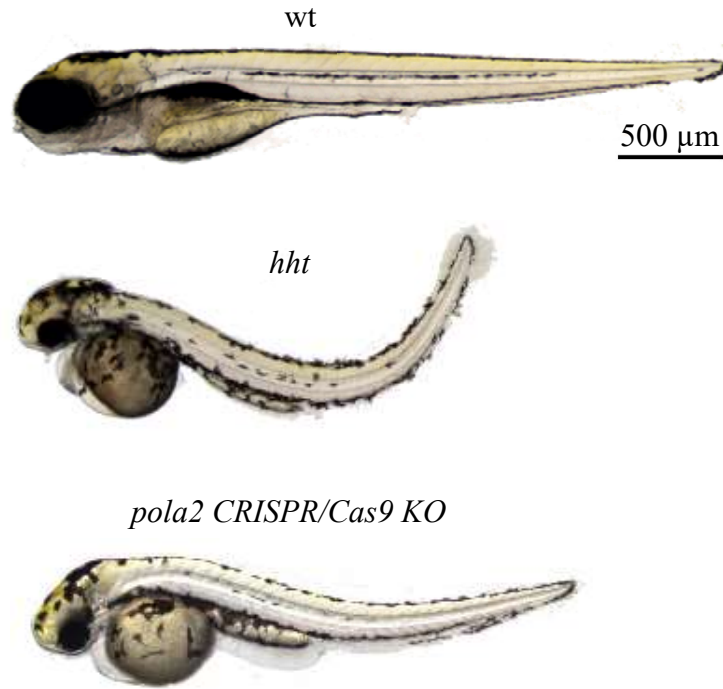

**Supplemental S3. Shared phenotype of CRISPR/Cas9 *pola2* knockouts and *hht***

**A)** The CRISPR/Cas9 knockout carried a 16-nucleotide insertion between nucleotides 927-928, causing a frameshift that changes the protein sequence after amino acid 308 in the 600-amino acid zebrafish Pola2 protein. Differences in severity in phenotype are consistent with variation in genetic background. **B)** Representative images of wild-type, *hht*, and *pola2* CRISPR/Cas9 knockout zebrafish larvae at 5 dpf. *hht* and *pola2* knockout fish shared small eyes, small head, enlarged and rounded yolk, and dorsally curved body.

623

624

625

626

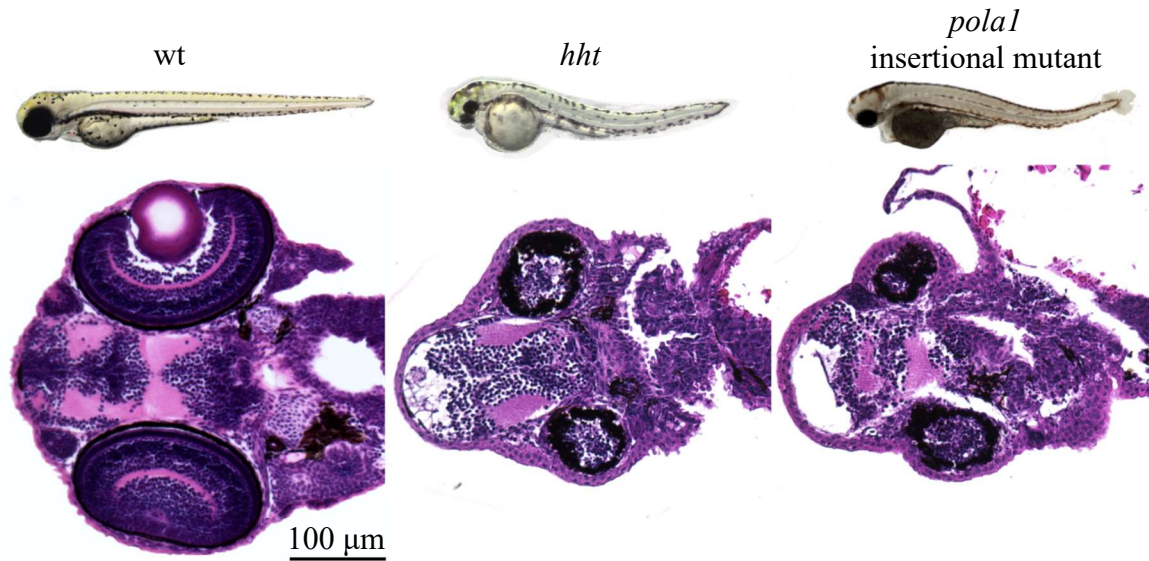

**Supplemental S4. Mutants of *pola1* and *pola2* exhibit virtually indistinguishable gross and histological phenotypes.** At 3 dpf, *hht*, our *pola2* null mutant, and a *pola2* insertional mutant both exhibit the combinatorial gross phenotype of small eyes, small head, rounded yolk, and curved body. Histologically, both mutants show a drastic reduction of cell number and loss of retinal layers in the eyes, reduced volume and disorganization of the white and gray matter of the brain. Scale bar = 100 μm.

627

## Aphidicolin

628

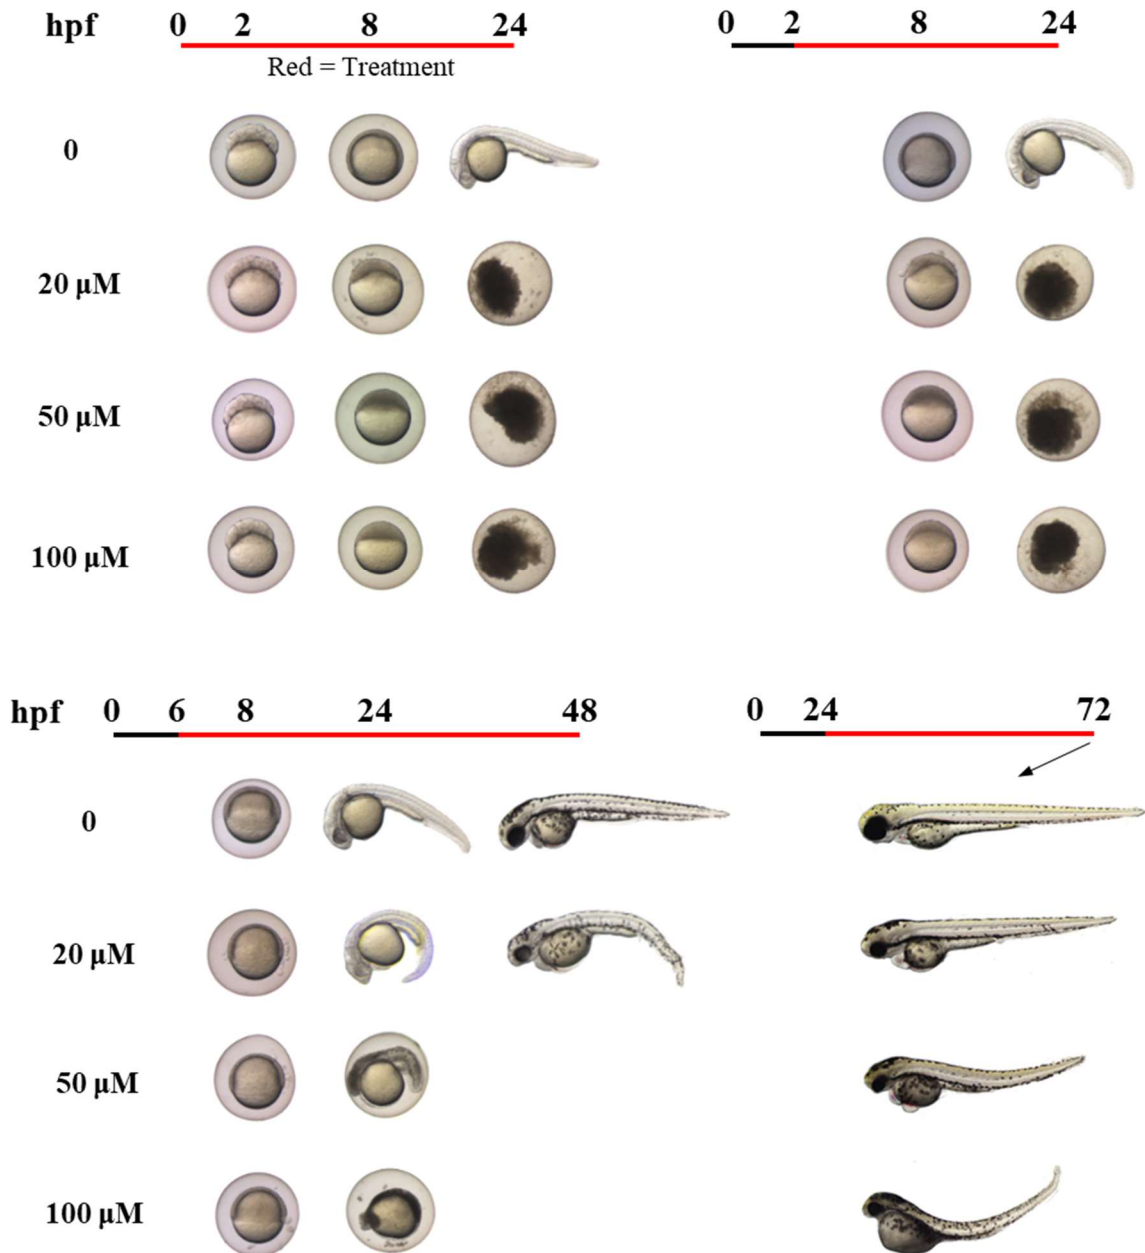

**Supplemental S5. Inhibition of replicative DNA polymerases by aphidicolin beginning in wild-type zebrafish larvae at 24 hours, but not earlier, phenocopies *hht* at 72 hpf.** Wild-type larvae were continuously exposed to 0, 20, 50, or 100  $\mu$ M aphidicolin in DMSO. Treatment began at 0, 2, 6, or 24 hpf. 10 larvae were treated for each condition. Representative images are shown. Black line = no treatment; red line = treatment.

## Hydroxyurea

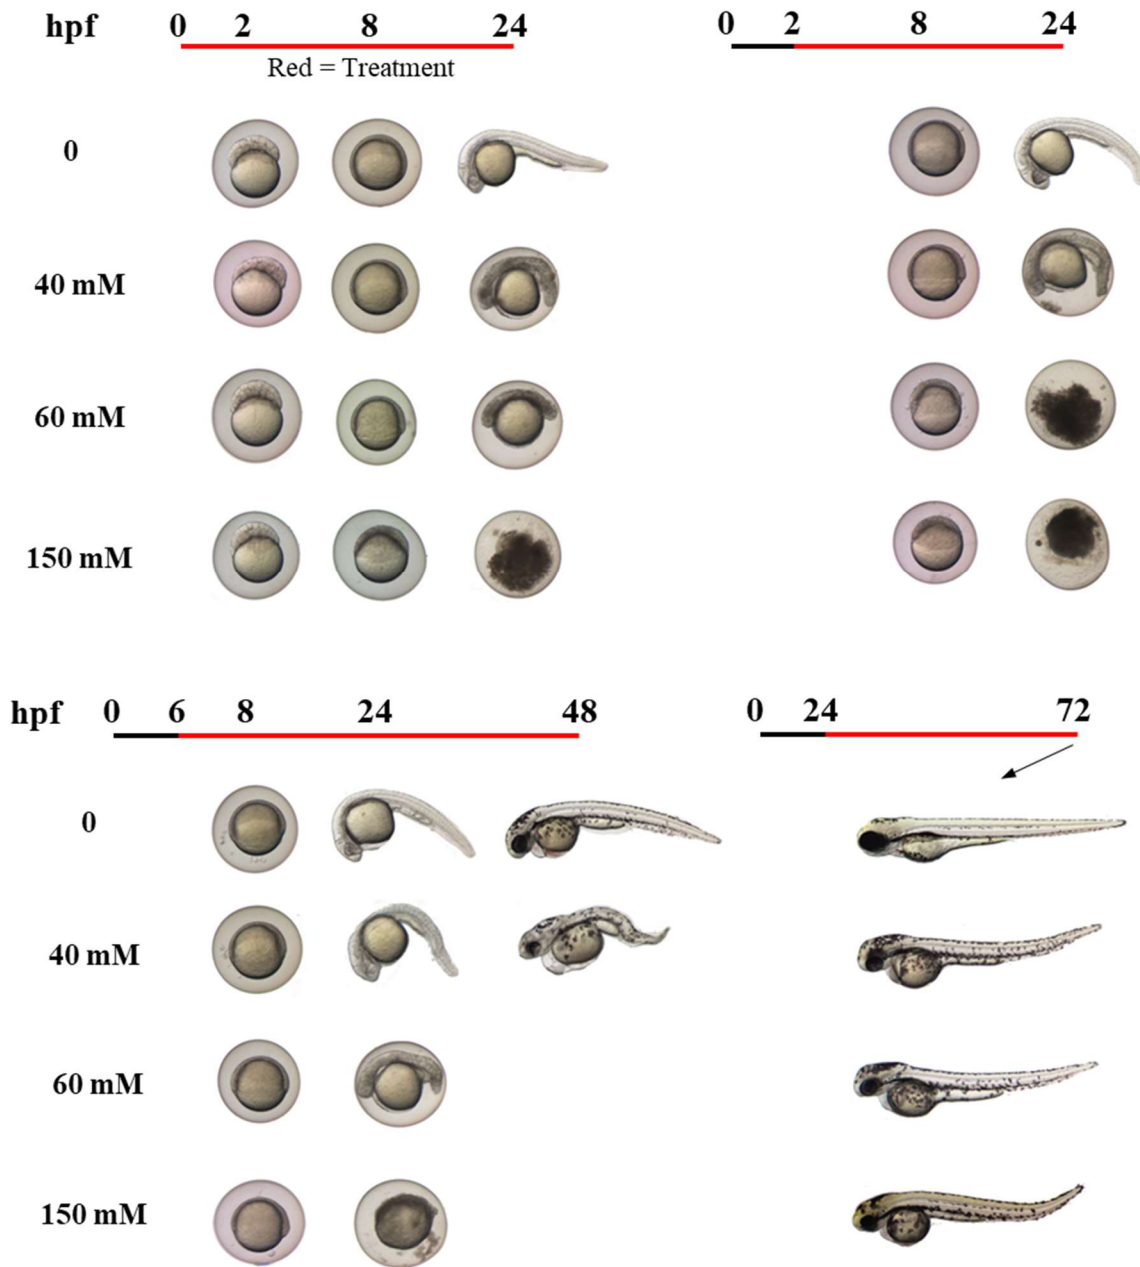

**Supplemental S6. Inhibition of deoxyribonucleotide production by hydroxyurea in wild-type zebrafish larvae beginning at 24 hours, but not earlier, phenocopies *hht* at 72 hpf.** Wild-type larvae were continuously exposed to 0, 40, 60, or 150 mM aqueous hydroxyurea. Chemical treatment began at 0, 2, 6, or 24 hpf. 10 larvae were treated for each condition. Representative images are shown. Black line = no treatment; red line = treatment.
